# Supplementary material for: Hepatic thyroid hormone signalling modulates glucose homeostasis through the regulation of GLP-1 production via bile acid-mediated FXR antagonism
Source: PubMed Central journal article supplement (PMC9613917; doi:10.1038/s41467-022-34258-w), 2022-10-27
Supplement: 41467_2022_34258_MOESM2_ESM.pdf [file 41467_2022_34258_MOESM2_ESM.pdf]

## Peer Review File

---

Title: Hepatic thyroid hormone signalling modulates glucose homeostasis through the regulation of GLP-1 production via bile acid-mediated FXR antagonism

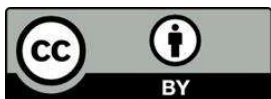

**Open Access** This file is licensed under a Creative Commons Attribution 4.0

International License, which permits use, sharing, adaptation, distribution and reproduction in any medium or format, as long as you give appropriate credit to

the original author(s) and the source, provide a link to the Creative Commons license, and indicate if changes were made. In the cases where the authors are anonymous, such as is the case for the reports of anonymous peer reviewers, author attribution should be to 'Anonymous Referee' followed by a clear attribution to the source work. The images or other third party material in this file are included in the article's Creative Commons license, unless indicated otherwise in a credit line to the material. If material is not included in the article's Creative Commons license and your intended use is not permitted by statutory regulation or exceeds the permitted use, you will need to obtain permission directly from the copyright holder. To view a copy of this license, visit <http://creativecommons.org/licenses/by/4.0/>.

## REVIEWER COMMENTS

Reviewer #1 (Remarks to the Author):

This manuscript proposes a four-organ interaction (a thyroid-liver-ileum-pancreas axis) whereby T3 signaling increases non-12 $\alpha$ -hydroxylated BA production in the liver. This results in increased GLP-1 synthesis and secretion from the ileum due to local reduction in FXR signaling by those non-hydroxylated BAs. Ultimately, this increase in GLP-1 is responsible of the T3-induced improvement in glucose tolerance.

This is an interesting premise that links different cellular mechanisms playing key roles in the control of glucose homeostasis that are susceptible of drug targeting. This undeniably adds interest to the work. However, there also significant limitations, which are explained below:

Most experiments are performed in the context of T3 replacement in pharmacologically (MMI)-induced hypothyroidism and conclusions are drawn based on simple pair-wise comparisons between minimally powered groups. Lack of back-to-back comparison with euthyroid controls limits the potential relevance of the findings a pathophysiological state. There is also some lack of lack of systematic comparability across otherwise similar experiments (e.g. groups or parameters are selectively shown).

Although increased GLP-1 levels are at the center of their hypothesis, conclusions are inferred out of small changes in ambient levels of GLP-1 or Gcg expression. Considering the low number of replicates and the small size of the effect, this is a significant weakness that challenges reproducibility. Sometimes conclusions are derived from overinterpretation of indirect assessments. For example, in Fig1n if the T3-improvement in tolerance were due to solely to increased GLP-1, then the effect of the blockade of GLP1R with Ex9 between T3 (difference between green vs yellow) the untreated groups (difference between blue vs red) should be statistically significant. Given that additional experiments providing a more accurate determination of the GLP-1 secretion kinetics would be desirable.

The T3-induced improvement in glucose tolerance were mimicked by treatment with a liver-biased TRb agonist and were is significantly attenuated in mice lacking TRb expression in the liver (although, and again, critical Albcre+ control mice were not investigated; additional details about the generation including targeting methodology, genomic context and general phenotype of the flox mouse should provided).

Nonetheless, this is an important experiment that compellingly demonstrate the role of hepatic T3 signaling in modulating glucose metabolism. There is no question that this TRb mediates some of the benefits of T3 and MB07811 on glycemic control. However, significant unknowns arise from this experiment that question the main hypothesis. For instance, loss of hepatic TRb3 signaling in liver does not result in dramatic increases in Cyp8b1 levels compared to controls, as it would be expected in light of the effect of MMI treatment. Since changes in BA composition were not investigated either, it is hard to attribute the loss of effect of T3 in the KO to changes in BA composition. Considering this, MMI treatment of liver-specific TRb KO mice, plus minus T3, would shed light on the actual contribution of

hepatic TRb signaling on the benefits seen with the T3 replacement in the MMI treated mice. If worsening in glycemic control (note that the TRb KO exhibit normal glucose tolerance) is seen and that can be normalized with T3 treatment, then other options should be considered.

Administration of TbmCA acid to MMI-treated mice recapitulated a similar effect to that of T3 replacement on glucose tolerance and Gcg expression, GLP-1 and insulin levels. Conversely, treated with CA or the gut-bias FXR agonist Fexeramine reverted some of the effects of T3 replacement in MMI-treated mice that are consistent with enhanced GLP-1 secretion. However, due to the concern manifested above, this interaction between FXR signaling and T3 could be due to independent events acting in parallel with different contributions. T3 treatment of MMI-treated, villin-cre:FXR flox mice would be certainly more convincing. This is not unreasonable considering that other modalities of BA signaling play a meaningful role regulating L-cell differentiation (<https://doi.org/10.2337/db19-0764>)

#### Reviewer #2 (Remarks to the Author):

In the current study by Yan et al., hepatic activation of T3 signaling is sufficient to promote the insulin secretion and lower the glucose levels. Furthermore, the team identified that this is due to reduction in CYP8B1 and increase in bile acids that are FXR antagonists. Based on one study reported in 2015 that inhibition of FXR in L cells increase GLP1 production and secretion, the authors concluded that the T3-mediated induction in proglucagon (precursor of GLP-1) in L cells is due to intestinal inhibition of FXR. While the conclusion is exciting, there are some concerns:

1. How about the regulation of T3 on other genes involved in bile acid synthesis? What about levels of bile acids that are TGR5 activators?
2. What are the effects of T3 on carbohydrate ingestion and other incretin secretion in addition to GLP-1?
3. Validation of TGR5 activation. How about comparing to report showing that FXR can induce TGR5? How about the activation status in the intestine epithelial cells and also in L cells
4. In humans, inhibition of CYP8B1 will lead to the bile acid pool enriched in CDCA, which is the most FXR endogenous ligand---opposite to rodents.
5. How about using T4 than T3? which is more commonly used in the clinic for the treatment of hypothyroidism.
6. In fig 6, it will be interesting to have additional control groups treated with CA or FEX with or without MMI

#### Reviewer #3 (Remarks to the Author):

The authors demonstrate that euthyroid animals have improved glucose tolerance and increased circulating insulin and circulating and intestinal GLP-1 levels compared to hypothyroid animals. Using a

wide range of models the authors demonstrate that liver TRB is required for (the majority of) this effect. Intestinal FXR is shown to modulate the beneficial effect of T3 on GLP-1 levels, plasma insulin and plasma glucose in hypothyroid mice. The authors postulate that the link between (hepatic) thyroid hormone signaling and changes in bile acid composition, resulting in increased GLP-1 secretion, is the enzyme CYP8B1 in liver. The data is novel, interesting and clinically relevant given the development of liver specific TRB agonists for the treatment of metabolic disease.

#### Specific Comments:

1. Is hyperglycemia commonly found in hypothyroid mouse models. To this reviewers knowledge the answer is no. What is the reason for this here. Other examples should be brought forward.
2. The increased levels of GLP-1 described in Figure 1J are not clear.
3. Why was GLP-1 not given directly to hypothyroid animals?
4. Ideally, further experiments should be provided to demonstrate KO of the TR in the liver. ie TH mediated gene expression of classic TR target genes. The model is under-described in all aspects.
5. In Figure 2 and Figure 3 the induction of hypothyroidism leads to a rise in blood glucose in both WT and KO animals and T3 or the analog reduces it only in WT or floxed animals. Why is there an induction of BG in hypothyroidism in the absence of the TR?
6. In Figure 3 there is no data on the high fat diet mice ie food intake, body weight etc. It is impossible to determine the effects of the MB compound in this setting.
7. In Figure 4 where is the RNA-Seq data of the genes regulated by feeding. What does Cyp8b1 do with increased feeding.
8. Also, in Figure 4, T3 is known to regulate many other genes involved in bile acid transport that also regulate bile acid hydrophobicity including cyp27a1 and cyp3a11 and as well bile acid transporters. These genes are not included in the analysis shown. Interestingly, Cyp8b1 has been identified previously as a target of TH signaling: Andersson U, Yang YZ, Bjorkhem I, Einarsson C, Eggertsen G, Gafvels M. Thyroid hormone suppresses hepatic sterol 12 $\alpha$ -hydroxylase (CYP8B1) activity and messenger ribonucleic acid in rat liver: failure to define known thyroid hormone response elements in the gene. *Biochim Biophys Acta*. 1999;1438(2):167–174. Additionally, thyroid hormone signaling has also been shown to alter bile acid composition previously and thus regulate intestinal cholesterol absorption (Astapova et al, *JCI* 2014).
9. The explanation of the data in Figure 7 is not clear. TSH is used to determine TH action. Do the TSH levels inversely correlate with the TH levels. Additionally do the T3 levels correlate with other actions of TH on the liver ie serum cholesterol.
10. Is there a CYP8B1-KO model available or specific inhibitor that would allow you to study the effect of T3 in the absence of CYP8B1?
11. Does the attenuated change in CYP8B1 in MMI+T3 treated L-TRBKO mice result in measurable changes in intestinal bile acid composition compared to controls?

#### Other comments:

12. Figure 2: . Please specify if these mice were rendered hypothyroid before being treated with T3 as this isn't mentioned in the figure legends or corresponding results section

13. The other bile acid receptor TGR5 has been described to be crucial for GLP-1 induction and several other metabolic effects. Did you find any evidence for a role of TGR5 in this pathway? Why did you choose to focus only on FXR?
14. In general the paper is well written but the discussion would benefit from a thorough read-through to correct several grammatical errors.
15. Please specify where the MB07811 TRB agonist was purchased and include data or references that demonstrate its liver and TRB specificity.
16. Have you done any of these experiments in female mice? If so please show (in supplemental)
17. Please state whether your human subjects provided informed consent in accordance with the declaration of Helsinki.

1 **REVIEWER COMMENTS**

2 **Reviewer #1 (Remarks to the Author):**

3 This manuscript proposes a four-organ interaction (a thyroid-liver-ileum-pancreas axis) whereby T3  
4 signaling increases non-12 $\alpha$ -hydroxylated BA production in the liver. This results in increased GLP-  
5 1 synthesis and secretion from the ileum due to local reduction in FXR signaling by those non-  
6 hydroxylated BAs. Ultimately, this increase in GLP-1 is responsible of the T3-induced improvement  
7 in glucose tolerance.

8 This is an interesting premise that links different cellular mechanisms playing key roles in the  
9 control of glucose homeostasis that are susceptible of drug targeting. This undeniably adds interest  
10 to the work. However, there also significant limitations, which are explained below:

11 Most experiments are performed in the context of T3 replacement in pharmacologically (MMI)-  
12 induced hypothyroidism and conclusions are drawn based on simple pair-wise comparisons between  
13 minimally powered groups. Lack of back-to-back comparison with euthyroid controls limits the  
14 potential relevance of the findings a pathophysiological state. There is also some lack of lack of  
15 systematic comparability across otherwise similar experiments (e.g. groups or parameters are  
16 selectively shown).

17 **Response to the Reviewer's Comments:** We thank the reviewer for the comments. We agree with  
18 the reviewer that lack of comparison with euthyroid controls limits the potential pathophysiological  
19 relevance. Previously, we did not include such a comparison for following reasons. 1) TRs are ligand  
20 (T3)-dependent nuclear receptors. For positively regulated genes, in the absence of T3, unliganded  
21 TRs (apoTRs) sit on the promoter of its target gene and repress transcription by recruiting  
22 corepressors rather than sit there doing nothing. In the presence of T3, liganded TRs (holoTRs)  
23 release corepressors and recruit coactivators, thereby stimulating the transcription. Thus, in the TR  
24 field, to identify T3 target genes or T3-regulated pathways that have maximal T3 responsiveness,  
25 mice were normally rendered hypothyroid before T3 treatment, while cultured cells were normally  
26 pre-cultured in Td (TH-deficient) medium before T3 treatment. 2) The role of TH in metabolism is  
27 profound, as TH normally coordinates metabolic pathways by targeting multiple enzymes and affect  
28 systemic homeostasis via its regulatory action in different metabolic tissues. The severity or duration  
29 of thyrotoxicosis or hormone treatment may yield inconsistent results. Based on available evidence,  
30 we speculate that TH may exert beneficial effects on glucose homeostasis at least within the normal  
31 range of thyroid function, while extremely high levels of TH may have deleterious effects on  
32 metabolic homeostasis. Furthermore, because MMI may have unknown effects on metabolism  
33 independent of its actions on TH synthesis in the thyroid, to minimize the effects of potential  
34 confounding factors and focus on the regulatory action of T3, we employed MMI-treated mice with  
35 detectable but low T3 levels as a control group and MMI-treated mice receiving T3 injections as an  
36 experimental group.

37 As suggested, we provided the data showing the differences between hypothyroid MMI-treated mice  
38 (MMI mice) and untreated euthyroid control mice (CT mice). Consistent with our hypothesis, MMI  
39 mice exhibited elevated blood glucose levels, impaired intraperitoneal and oral glucose tolerance,  
40 decreased insulin levels, and reduced GLP-1 expression and production as compared to CT mice  
41 (Supplementary Fig. 1k-n). It is worth noting that, as the half-life of T3 in mouse serum is about 2

42 hours, MMI mice receiving daily injection of T3 are not an authentic mouse model for clinical  
43 hyperthyroidism. Thus, we should be cautious when they were compared directly to euthyroid mice.  
44 To avoid potential confusion and interpret the data correctly in a straightforward way, we decided  
45 to show the results of comparison between MMI mice and CT mice (euthyroid controls) rather than  
46 the results of comparison between T3-treated MMI mice (MMI+T3 mice) with CT mice in our  
47 revised manuscript (Supplementary Fig. 1k-n, 4h, i, 5b-e). Similar comparisons could also be found  
48 in Supporting data (Supporting Fig. 1e, f, 2i-k, 3a).

49 As the reviewer suggested, to substantiate our notion by increasing sample numbers in Fig. 1b, 1d, 1e,  
50 and 1h (previous version), we repeated these experiments and provided the new data in our revised  
51 manuscript (Fig. 1a, c, d, and the left panel of f). In addition, more control groups were included for  
52 better systematic comparability and more detailed information for general phenotype of the mice  
53 and experimental conditions were also provided in our revised manuscript (Supplementary Fig. 1i,  
54 k-n, 2g-i, 4h, i, 5b-e and Supporting Fig. 1d-f, 2a, i-k).

55 Although increased GLP-1 levels are at the center of their hypothesis, conclusions are inferred out  
56 of small changes in ambient levels of GLP-1 or Gcg expression. Considering the low number of  
57 replicates and the small size of the effect, this is a significant weakness that challenges  
58 reproducibility. Sometimes conclusions are derived from overinterpretation of indirect assessments.  
59 For example, in Fig1n if the T3-improvement in tolerance were due to solely to increased GLP-1,  
60 then the effect of the blockade of GLP1R with Ex9 between T3 (difference between green vs yellow)  
61 the untreated groups (difference between blue vs red) should be statistically significant. Given that  
62 additional experiments providing a more accurate determination of the GLP-1 secretion kinetics  
63 would be desirable.

64 **Response to the Reviewer's Comments:** We thank the reviewer for the comments and suggestion.  
65 Regarding the reproducibility, all animal experiments in our previously submitted manuscript had  
66 been repeated at least two to three times. Indeed, the regulation of GLP-1 production by either T3  
67 or MB07811 treatment can be easily detected in mice under various conditions (Fig. 1f, k, 2b, 3a, e,  
68 i, 4j, 6d, 7b, d, g and Supplementary Fig 1i, 2h, 3b, 7c, e). As the reviewer suggested, to substantiate  
69 our conclusion, we repeated the experiment by using a larger sample size and obtained similar  
70 results (Fig. 1n). Since Ex-9 treatment could attenuate the T3 effect on oral glucose tolerance, we  
71 speculate that GLP-1 is critically involved in the T3 action on glucose metabolism. As suggested,  
72 we also compared the changes in AUC after Ex-9 treatment between MMI+T3 mice and MMI mice.  
73 In line with the data that the GLP-1 levels were higher in MMI+T3 mice than those in MMI mice,  
74 a significantly larger effect of Ex-9 treatment was observed in MMI+T3 mice than that in MMI  
75 mice, further supporting our notion that GLP-1 is critically involved in the T3 action on glucose  
76 metabolism (Fig. 1n and Supporting data Fig. 1a-c).

77 To be noted, as the T3 levels were decreased but still detectable after MMI treatment, therefore, we  
78 speculate the retained T3 action might contribute to the observed effect of Ex-9 in MMI mice (Fig.  
79 1n and Supporting data Fig. 1a). Nevertheless, since the sensitivity and specificity of different assays  
80 vary and systemic administration of T3 would affect other metabolic tissues, we could not totally  
81 rule out the possibility that other mechanisms might also be involved here. Indeed, in this study, we  
82 intended not to claim that the observed beneficial effect of systemic T3 treatment were solely due  
83 to the increased GLP-1 production. Based on our findings in this study, we prefer to hypothesize

84 that the beneficial effect of hepatic TR $\beta$ -mediated T3 effect might be primarily attributed to the  
85 regulation of GLP-1 production by T3 via BA-mediated FXR antagonism.

86 Furthermore, as the reviewer suggested, we determined the kinetics by measuring the GLP-1 and  
87 insulin levels during the oGTT assay. We found that the GLP-1 levels were higher before glucose  
88 oral ingestion and elevated more markedly after glucose oral ingestion in MMI+T3 mice than those  
89 in MMI mice (Supplementary Fig. 1e). Similar results were observed for the insulin levels during  
90 the oGTT assay (Supplementary Fig. 1f). These data indicate that the capacity of GLP-1 production  
91 was enhanced in MMI+T3 mice as compared to MMI mice.

92 The T3-induced improvement in glucose tolerance were mimicked by treatment with a liver-biased  
93 TRb agonist and were is significantly attenuated in mice lacking TRb expression in the liver  
94 (although, and again, critical Albcre<sup>+</sup> control mice were not investigated; additional details about  
95 the generation including targeting methodology, genomic context and general phenotype of the flox  
96 mouse should provided).

97 **Response to the Reviewer's Comments:** We thank the reviewer for the comments and suggestion.  
98 Liver-selective TR $\beta$  knockout (LTR $\beta$ KO) mice were generated by cross-breeding of TR $\beta$  flox/flox  
99 mice with loxP sites flanking the fifth TR $\beta$  exon (TR $\beta$  Floxed mice), developed by Shanghai Model  
100 Organism Center, Inc., with mice harboring Cre-recombinase under the control of albumin promoter  
101 (Alb-Cre mice) (Supplementary Fig. 2d, e). We provided detailed information, including targeting  
102 methodology, genetic background, and general phenotype of the TR $\beta$  Floxed (TR $\beta^{f/f}$ ) mice in our  
103 revised manuscript (Supplementary Fig. 2d and Page 16, Line 528-532). Briefly, TR $\beta$  Floxed (TR $\beta^{f/f}$ )  
104 mice were fertile and appeared indistinguishable from TR $\beta^{+/+}$  control littermates. There was no  
105 significant difference in body weight, food intake, glucose and insulin levels between TR $\beta^{f/f}$  mice  
106 and TR $\beta^{+/+}$  controls (Supporting data Fig. 1d). As the reviewer suggested, we also compared the  
107 LTR $\beta$ KO mice (TR $\beta^{f/f}$ , Alb-Cre<sup>+</sup>) with Alb-Cre<sup>+</sup> control mice (TR $\beta^{+/+}$ , Alb-Cre<sup>+</sup>). As expected, the  
108 MB07811 effects on GLP-1, insulin, and glucose levels were abolished in LTR $\beta$ KO mice lacking  
109 hepatic TR $\beta$  as compared to Alb-cre<sup>+</sup> control mice (Supplementary Fig. 3b).

110 Nonetheless, this is an important experiment that compellingly demonstrate the role of hepatic T3  
111 signaling in modulating glucose metabolism. There is no question that this TRb mediates some of  
112 the benefits of T3 and MB07811 on glycemc control. However, significant unknowns arise from  
113 this experiment that question the main hypothesis. For instance, loss of hepatic TRb3 signaling in  
114 liver does not result in dramatic increases in Cyp8b1 levels compared to controls, as it would be  
115 expected in light of the effect of MMI treatment. Since changes in BA composition were not  
116 investigated either, it is hard to attribute the loss of effect of T3 in the KO to changes in BA  
117 composition. Considering this, MMI treatment of liver-specific TRb KO mice, plus minus T3, would  
118 shed light on the actual contribution of hepatic TRb signaling on the benefits seen with the T3  
119 replacement in the MMI treated mice. If worsening in glycemc control (note that the TRb KO  
120 exhibit normal glucose tolerance) is seen and that can be normalized with T3 treatment, then other  
121 options should be considered.

122 **Response to the Reviewer's Comments:** We thank the reviewer for the comments and suggestion.  
123 In our study, loss of TR $\beta$  in liver only slightly increased the mRNA levels but not the protein levels  
124 of CYP8B1 (Fig. 4i, f), suggesting compensatory mechanisms may exist. In line with these results,  
125 no differences in ileal BA composition (percentages of 12 $\alpha$ -OH BAs and non-12 $\alpha$ -OH BAs) (Fig.



126 4n, 5d) and GLP-1 production (Fig. 2b, 3e and Supplementary Fig. 2h) were observed between  
127 LTR $\beta$ KO and Floxed mice. In contrast, MMI treatment led to an elevation of CYP8B1 levels,  
128 accompanied with altered BA composition (Supplementary Fig. 4h, i) and GLP-1 production  
129 (Supplementary Fig. 1n). This is not surprising because it has been proposed that, unlike steroid  
130 hormone receptors, TRs can act in the absence of the ligand as aporeceptors (apoTRs), which have  
131 an intrinsic activity rather than being silent. These apoTRs repress basal transcription of positively  
132 regulated genes and stimulate that of negatively regulated genes. In agreement with this notion,  
133 unliganded TRs (apoTRs) in MMI mice might act to increase the mRNA expression of CYP8B1,  
134 thereby altering the BA composition and impairing glucose metabolism (Supplementary Fig. 1k, l,  
135 4h, i). It is worth noting that, as a matter of fact, more severe defects were normally observed in  
136 hypothyroid subjects than those subjects harboring TR mutations.

137 As the reviewer suggested, we rendered LTR $\beta$ KO mice hypothyroid followed by T3 treatment. In  
138 line with our previous findings, T3 treatment markedly repressed the mRNA expression of CYP8B1  
139 and lowered the glucose levels in MMI-treated Floxed mice, while loss of hepatic TR $\beta$  could block  
140 these effects in MMI-treated mice, further supporting our hypothesis that hepatic TR $\beta$  signaling  
141 contributes to the benefits seen with the T3 treatment (Supporting data Fig. 1e). It has been proposed  
142 that TH deprivation induces a strong apoTR activity, while the effect of the absence of TH can be  
143 attenuated by the removal of TR [1]. Interestingly, the mRNA levels of CYP8B1 were not reduced  
144 in MMI-treated LTR $\beta$ KO mice compared to MMI-treated Floxed mice. Moreover, the glycemic  
145 control was not improved after the removal of hepatic TR $\beta$  in MMI-treated mice (Supporting data  
146 Fig. 1e). These observations indicate that apoTR $\alpha$  but not apoTR $\beta$  may play a more important role  
147 at least in the control of CYP8B1 transcription, which agrees with the previous notion that TR $\beta$  may  
148 have no aporeceptor activity in liver [1]. Notably, our findings are similar to those observed for TSH,  
149 another negatively regulated target gene of T3. It has been proposed that TR $\alpha$  but not TR $\beta$  seems to  
150 be responsible for aporeceptor-mediated activation of TSH. Because whether apoTRs are silent or  
151 whether they have an intrinsic activity should be determined by measuring the gene activity in the  
152 absence of TH and in the absence of individual TR isoforms, to fully understand the role of hepatic  
153 apoTRs in metabolic regulation, a more careful examination is needed in the future. Anyway, to the  
154 best of our knowledge and according to our data, we believe that physiological homeostasis depends  
155 on a precise balance between apoTRs and holoTRs, the apoTRs participate in the fine-tuning of T3-  
156 target genes, and the combination of holoTRs with active apoTRs permits a larger amplitude of  
157 transcriptional responses to moderate variations in T3 concentrations. Because we mainly focus on  
158 the beneficial T3 effect and the role of liganded TR $\beta$  (holoTR $\beta$ ) in current study, we provided the  
159 related data from MMI-treated LTR $\beta$ KO mice as supporting data (Supporting data Fig. 1e, f) to  
160 avoid confusion due to the potential contribution from apoTR.

161 Additionally, we noticed that lacking hepatic TR $\beta$  abolished the T3 effect on CYP8B1 expression  
162 and glucose tolerance in MMI-treated mice, which further supports our proposed model involving  
163 the action of hepatic TR $\beta$  and incretin GLP-1 (Supporting data Fig. 1e, f). We also noticed a small  
164 reduction of glucose levels in MMI-treated LTR $\beta$ KO mice after T3 treatment, although the  
165 difference did not reach statistical significance ( $p=0.06$ ) (Supporting data Fig. 1e, left panel). These  
166 results indicate that systemic administration of T3 might also affect glucose metabolism via other  
167 mechanisms, which seemed to be not as dominant as those mediated by hepatic TR $\beta$  under these  
168 experimental conditions. Based on our findings in this study, we believe we have discovered a novel

169 role of T3 and hepatic TR $\beta$  in modulating glucose homeostasis, which involves the regulation of  
170 GLP-1 production via BA -mediated FXR antagonism. Nevertheless, we did not intend to exclude  
171 the possibility that other mechanism exists that also contribute the profound role of T3 in glucose  
172 homeostasis.

173 Administration of T $\beta$ MCA acid to MMI-treated mice recapitulated a similar effect to that of T3  
174 replacement on glucose tolerance and Gcg expression, GLP-1 and insulin levels. Conversely, treated  
175 with CA or the gut-bias FXR agonist Fexeramine reverted some of the effects of T3 replacement in  
176 MMI-treated mice that are consistent with enhanced GLP-1 secretion. However, due to the concern  
177 manifested above, this interaction between FXR signaling and T3 could be due to independent  
178 events acting in parallel with different contributions. T3 treatment of MMI-treated, villin-cre:FXR  
179 flox mice would be certainly more convincing. This is not unreasonable considering that other  
180 modalities of BA signaling play a meaningful role regulating L-cell differentiation  
181 (<https://doi.org/10.2337/db19-0764>)

182 **Response to the Reviewer's Comments:** We thank the reviewer for the comments and suggestion.  
183 We agree with the reviewer that other mechanisms might also be involved in the regulation of  
184 glucose metabolism by systemic administration of T3 in mice. Our findings in LTR $\beta$ KO mice and  
185 MB07811-treated animals support our hypothesis that hepatic TR $\beta$  signalling plays a critical role in  
186 modulating glucose homeostasis through the regulation of GLP-1 production via BA-mediated FXR  
187 antagonism. As the reviewer suggested, to test whether intestinal FXR signalling was essential for  
188 the T3 action observed in this study, intestine-specific FXR-null mice (IFXRKO) were employed  
189 [24]. We found that the T3 effects on the mRNA expression of ileal proglucagon, GLP-1, insulin,  
190 and glucose levels, and oral glucose tolerance were all abolished in IFXRKO mice in hypothyroid  
191 state (Fig. 7a-c). Similar results were observed when MB07811 was used for treatment in IFXRKO  
192 mice in hypothyroid state (Fig. 7d-f). We also found that the T3 effects on the GLP-1, insulin, and  
193 glucose levels, and oral glucose tolerance were all attenuated in euthyroid IFXRKO mice  
194 (Supplementary Fig. 7c, d). Similar data were obtained when MB07811 was used for treatment in  
195 IFXRKO mice in euthyroid state (Supplementary Fig. 7e, f). These results indicate that intestinal  
196 FXR is indispensable for the beneficial effect of either T3 or MB07811 on GLP-1 production and  
197 glucose homeostasis. Additionally, consistent with our current knowledge of intestinal FXR  
198 signalling and our working hypothesis, the GLP-1 production was increased, while the glucose  
199 metabolism was improved in MMI-treated IFXRKO mice as compared to MMI-treated Floxed mice  
200 (Fig. 7a-f). Notably, in line with the previous findings that intestinal FXR is not required for  
201 maintaining the normal glucose homeostasis [2], the glucose metabolism was normal in IFXRKO  
202 mice in the euthyroid state, suggesting that compensatory mechanisms may exist (Supplementary  
203 Fig. 7c-f).

204 We also agree with the reviewer that other modalities of BA signaling might also play a role here.  
205 We then tested whether increased T $\beta$ MCA could have impact on L-cell differentiation. In cultured  
206 enteroendocrine cells and intestinal organoids, T $\beta$ MCA treatment not only increased the GLP-1  
207 expression and secretion (Fig. 6e, g and Supplementary Fig. 6c-e) but also elevated the mRNA  
208 expression of Ngn3, NeuroD1, and Arx, which are key genes associated with L-cell differentiation  
209 and endocrine specification, indicating that the increased T $\beta$ MCA might also be able to promote the  
210 L-cell differentiation (Supplementary Fig. 6g). Accordingly, elevated mRNA levels of Ngn3,  
211 NeuroD1, and Arx were observed after T3 or MB07811 treatment in the ileum of MMI mice

212 (Supporting data Fig. 1g). Given that paracrine GLP-1 signalling has been implicated in L-cell  
213 differentiation [3], based on our data, we speculate that activation of hepatic TR $\beta$  signalling might  
214 increase the T $\beta$ MCA levels in ileum, subsequently promoting the GLP-1 secretion in L-cells, which  
215 would act in both endocrine and paracrine manners to modulate insulin secretion and glucose  
216 metabolism and enhance the endocrine function of L-cell by recruiting more L-cells, respectively.

217 **Reviewer #2 (Remarks to the Author):**

218 In the current study by Yan et al., hepatic activation of T3 signaling is sufficient to promote the  
219 insulin secretion and lower the glucose levels. Furthermore, the team identified that this is due to  
220 reduction in CYP8B1 and increase in bile acids that are FXR antagonists. Based on one study  
221 reported in 2015 that inhibition of FXR in L cells increase GLP1 production and secretion, the  
222 authors concluded that the T3-mediated induction in proglucagon (precursor of GLP-1) in L cells is  
223 due to intestinal inhibition of FXR.

224 While the conclusion is exciting, there are some concerns:

225 1. How about the regulation of T3 on other genes involved in bile acid synthesis? What about levels  
226 of bile acids that are TGR5 activators?

227 **Response to the Reviewer's Comments:** We thank the reviewer for raising these questions. In line  
228 with previous findings, the mRNA expression of other enzymes involved in BA synthesis, such as  
229 CYP7A1, CYP27A1, and CYP7B1, was positively regulated by T3 treatment (Supporting data Fig.  
230 2a). Based on our knowledge and our findings, we hypothesize that T3 treatment not only promotes  
231 BA synthesis by regulating the expression of these enzymes but also modulates the BA composition  
232 by targeting CYP8B1. Our new data demonstrate that knockdown of CYP8B1 could attenuate the  
233 effect of T3 treatment on the GLP-1 production and glucose metabolism in MMI mice, strongly  
234 supporting the notion that CYP8B1 might be the primary BA synthetic enzyme responsible for the  
235 observed glucose-lowering effect of T3 (Fig. 4j-l and Supplementary Fig. 4g).

236 Additionally, as the reviewer suggested, we analyzed the levels of BAs with TGR5 agonist activities.  
237 We found that T3 treatment decreased the total percentage of BAs with TGR5 agonist activities in  
238 the ileum of MMI mice, while the percentage of DCA, which is abundant in ileum and exhibits  
239 potent TGR5 agonist activity, was not altered (Supplementary Fig. 5f). As we did not observe an  
240 elevation in the levels of these TGR5-agonistic BAs, we speculate that FXR-mediated pathway  
241 rather than TGR5-mediated pathway is critically involved after T3 treatment in mice. Consistently,  
242 in human feces, positive correlation was also not observed between the T3 level and the percentage  
243 of potent TGR5-agonistic BAs (LCA and DCA), while a negative correlation was observed between  
244 T3 level and the percentage of total TGR5-agonistic BAs (Supplementary Fig. 8c, d), further  
245 indicating that TGR5 signalling might not play a considerable role here.

246 2. What is the effects of T3 on carbohydrate ingestion and other incretin secretion in addition to  
247 GLP-1?

248 **Response to the Reviewer's Comments:** We thank the reviewer for raising this question. In order  
249 to investigate whether T3 could impact GLP-1 production directly in intestinal L-cells, we employed  
250 enteroendocrine STC-1 and NCI-H716 cells and mouse intestinal organoids. We found that T3 had  
251 no effect on GLP-1 production and expression in enteroendocrine cells and intestinal organoids

252 (Supplementary Fig. 2a-c), suggesting that T3 might regulates GLP-1 production in a cell-  
253 nonautonomous manner. As the reviewer suggested, we examined the expression of Sglt1 and Glut2,  
254 two key transporters involved in carbohydrate ingestion in these enteroendocrine cells and intestinal  
255 organoids after T3 treatment. We found that T3 treatment had no effect on Sglt1 and Glut 2 mRNA  
256 levels (Supporting data Fig. 2b, c). Similar results were observed in the ileum of T3 or MB-treated  
257 MMI mice (Supporting data Fig. 2d). These data suggest that glucose absorption might not play a  
258 significant role here. We also would like to point out that the plasma levels of GLP-1 were higher  
259 in MMI+T3-5d mice than those in MMI mice before glucose challenge in oGTT assay (0 min, Fig.  
260 1e and Supplementary Fig. 1e). Moreover, the GLP-1 expression and plasma levels of GLP-1 were  
261 also higher in MMI+T3-5d mice than those in MMI mice without any treatment (Fig. 1f, g, k, 4j,  
262 6d, 7a, b, g and Supplementary Fig. 1g). These data suggest that the basal level of GLP-1 production  
263 or the capacity of GLP-1 production has been already increased or enhanced by T3 treatment, which  
264 is independent of glucose ingestion.

265 Additionally, as suggested, we investigated the T3 effect on the expression of PYY, another gut  
266 hormone produced by L-cells. We found that the mRNA expression of PYY was not altered in the  
267 enteroendocrine STC-1 and NCI-H716 cells, mouse intestinal organoids, as well as the ileum of  
268 mice after T3 or MB07811 treatment as indicated (Supporting data Fig. 2d, e). We also examined  
269 the production of another incretin, glucose-dependent insulinotropic polypeptide (GIP). We found  
270 that, in contrast to GLP-1, the plasma GIP levels and the ileal GIP mRNA levels were not altered  
271 after T3 or MB07811 treatment in mice (Supplementary Fig. 1o). We also could not observe any  
272 changes in GIP mRNA expression in the intestinal organoids after T3 administration  
273 (Supplementary Fig. 1o). These results suggest that GIP might not be involved in the regulation of  
274 glucose metabolism by TH observed in this study. Based on these results and others including the  
275 new data obtained from *in vitro* experiments using BAs (Fig. 6e-h and Supplementary Fig. 6c-h),  
276 we propose that T3 regulates GLP-1 production in a cell-nonautonomous manner via BA-mediated  
277 FXR antagonism.

278 3. Validation of TGR5 activation. How about comparing to report showing that FXR can induce  
279 TGR5? How about the activation status in the intestine epithelial cells and also in L cells.

280 **Response to the Reviewer's Comments:** We thank the reviewer for the suggestion. As the reviewer  
281 suggested, to test the TGR5 activation, we first measured the cAMP levels in the ileum of mice and  
282 found that either T3 or MB07811 treatment could not affect the cAMP levels (Supplementary Fig.  
283 5h). We also employed enteroendocrine STC-1 and NCI-H716 cells and mouse intestinal organoids  
284 to investigate the effect of T3 and BAs on TGR5 activation. Interestingly, we found that T3  
285 treatment had no effect on cAMP levels in these enteroendocrine cells and intestinal organoids  
286 (Supplementary Fig. 5i), suggesting that T3 could not affect the GLP-1 production in L-cells by  
287 directly activating TGR5 signalling. We then treated enteroendocrine cells and intestinal organoids  
288 with T $\beta$ MCA. We found that T $\beta$ MCA could increase GLP-1 expression and production, and  
289 decrease the mRNA expression of SHP, a downstream target of FXR, in STC-1 cells, NCI-H716  
290 cells, and intestinal organoids (Fig. 6e, g and Supplementary Fig. 6c-e). Meanwhile, we found that,  
291 in contrast to potent TGR5-agonistic BAs (DCA etc.), T $\beta$ MCA treatment did not elevate the cAMP  
292 levels in STC-1 cells, NCI-H716 cells, and intestinal organoids (Supplementary Fig. 6h), suggesting  
293 that the increased T $\beta$ MCA after T3 treatment would not activate TGR5 signalling in mice. These  
294 results together with other findings in this study, suggest that the increased ileum T $\beta$ MCA after T3

295 treatment might promote the GLP-1 production in L-cells through FXR inhibition but not through  
296 TGR5 activation.

297 Additionally, as suggested, we checked the expression of TGR5 after FXR inhibition or activation.  
298 In agreement with previous reports showing the regulation of TGR5 by FXR [4, 5], we found that  
299 ileal TGR5 mRNA expression was decreased in MMI-treated IFXRKO mice (mice lacking intestinal  
300 FXR) regardless of T3 administration (Supporting data Fig. 2f). Consistently, either CA or FEX  
301 treatment led to an elevation of TGR5 mRNA levels in the ileum of mice (Supporting data Fig. 2g).  
302 Also consistent with above-mentioned reports and our current findings, the TGR5 mRNA  
303 expression was decreased by T $\beta$ MCA treatment in STC-1 cells, NCI-H716 cells, and intestinal  
304 organoids (Supporting data Fig. 2h).

305 4. In humans, inhibition of CYP8B1 will lead to the bile acid pool enriched in CDCA, which is the  
306 most FXR endogenous ligand---opposite to rodents.

307 **Response to the Reviewer's Comments:** We thank the reviewer for the comments. We agree with  
308 the reviewer that inhibition of CYP8B1 will lead to the BA pool enriched in CDCA in human. To  
309 test whether BAs with FXR antagonist activities have any effects on the FXR activities in the  
310 presence of CDCA, we determined the effect of BAs with FXR antagonist activities on the FXR  
311 signalling and GLP-1 production in the presence of CDCA *in vitro* using human enteroendocrine  
312 NCI-H716 cells. Interestingly, we found that treatment of FXR-antagonistic BAs could reduce the  
313 SHP mRNA levels and increase the GLP-1 production (Fig. 6h and Supplementary Fig. 6f). These  
314 data suggest that FXR-antagonistic BAs can antagonize the effect of CDCA on FXR activities. Thus,  
315 based on these data, we speculate that changes in FXR-antagonistic BA levels would influence FXR  
316 activities, thereby modulating the production of GLP-1 in L-cells.

317 5. How about using T4 than T3? which is more commonly used in the clinic for the treatment of  
318 hypothyroidism.

319 **Response to the Reviewer's Comments:** We thank the reviewer for the comments and suggestion.  
320 As the reviewer suggested, we tested the effect of T4. To avoid the adverse effect of hyperthyroidism  
321 induced by T4 treatment, a low dose of T4 (at a dosage of 60ug/100g BW) was used. We found that  
322 treatment of T4 for 5 days decreased glucose levels, increased oral glucose tolerance, and enhanced  
323 insulin and GLP-1 production in MMI mice, which were very similar to the effects observed for T3  
324 treatment (Supplementary Fig. 1j).

325 6. In fig 6, it will be interesting to have additional control groups treated with CA or FEX with or  
326 without MMI.

327 **Response to the Reviewer's Comments:** We thank the reviewer for the suggestion. We provided  
328 the data showing the effects of CA and FEX in mice with or without MMI treatment (Supporting  
329 data Fig. 2i-k). In agreement with our working hypothesis, MMI treatment resulted in a decrease in  
330 GLP-1 production and insulin levels but an increase in glucose levels. Either CA or FEX treatment  
331 did not affect the levels of GLP-1, insulin, and glucose in MMI mice. These data suggest that  
332 activating FXR by administration of endogenous or synthetic agonist would not further suppress the  
333 GLP-1 production and worsen the glucose metabolism in MMI mice probably because FXR was  
334 already activated due to the decreases in FXR-antagonistic BAs in enteroendocrine L-cells. In the  
335 mice without MMI treatment (CT mice), FEX had no significant effect on these parameters, while

336 CA slightly decreased glucose levels, increased GLP-1 expression and production, and insulin level,  
337 although some of the differences did not reach statistical significance. We interpret these two results  
338 as follows.

339 We did not observe any FEX effect on the glucose and GLP-1 levels in normal mice, which is not  
340 surprising (Supporting data Fig. 2i, k). It has been reported that 5 weeks of FEX treatment, which  
341 resulted in intestinally restricted FXR activation, could affect glucose homeostasis in obese mice  
342 but not in normal mice, which might involve the browning of adipose tissues and weight loss [6]. It  
343 has also been reported that 7 days of FEX treatment could increase GLP-1 production and oral  
344 glucose tolerance in mice in an either FXR- or TGR5-dependent manner, which might involve the  
345 action of gut microbiota [5]. Notably, in the same study, 9 days of FEX treatment could increase the  
346 GLP-1 production and improve oral glucose tolerance in obese mice, which was accompanied by a  
347 decrease in body weight [5]. In a recent paper, 28 days of FEX treatment did not affect GLP-1  
348 production and oral glucose tolerance in mice (6 weeks old) [7]. In line with these data, we also did  
349 not observe the effects of FEX treatment on the levels of glucose, insulin, and GLP-1 and body  
350 weight in normal mice (CT mice) (Supporting data Fig. 2i, k), suggesting that some of FEX effects  
351 observed in obese mice might be attributed to the weight loss after long-term FEX treatment, which  
352 might involve gut microbiota-mediated TGR5 signaling. Interestingly, in our study, 5 days of FEX  
353 treatment could attenuate the T3 effects on the levels of glucose, insulin, and GLP-1 in MMI-treated  
354 mice without changing the body weight (Fig. 7g). Based on these findings and our other data, we  
355 speculate that inactivation of FXR signalling might be critically involved in hepatic T3 signalling-  
356 mediated regulation of GLP-1 production and glucose metabolism, which did not require either the  
357 weight loss or the involvement of TGR5 signaling. Nevertheless, we did not intend to exclude the  
358 possibility that other mechanism exists that also contribute the profound role of T3 in glucose  
359 homeostasis.

360 BAs function as endogenous ligands for FXR, which has a complex role in metabolic homeostasis.  
361 FXR total knockout mice developed hyperglycemia on a normal chow diet, while they exhibited  
362 improved glucose homeostasis on a high-fat diet [8, 9]. Although contradictory observations have  
363 been reported using systemic FXR agonists, beneficial effects were normally observed in chow-fed  
364 mice, whereas exacerbated glucose intolerance is seen under pathophysiological conditions such as  
365 obesity [4, 10-12]. Consistent with a previous report showing that CA feeding could decrease fasting  
366 glucose by approximately 50% in mice [13], in this study, we also detected a beneficial effect of CA  
367 treatment in normal mice, as evident from reduced glucose levels and increased GLP-1 expression  
368 and production, although some of the differences did not reach statistical significance (Supporting  
369 data Fig. 2j). However, in MMI mice, CA lost its beneficial effect, probably due to the already  
370 enhanced intestinal FXR signalling (Supporting data Fig. 2j). Importantly, consistent with current  
371 knowledge for intestinal FXR, administration of CA significantly attenuated T3-induced elevation  
372 of GLP-1 and insulin levels and the glucose-lowering effect of T3 in MMI mice (Fig. 6d). These  
373 data further support the notion that FXR is essential for normal glucose homeostasis and inhibition  
374 of FXR might serve as an approach in glycemic control under disease states.

375 **Reviewer #3 (Remarks to the Author):**

376 The authors demonstrate that euthyroid animals have improved glucose tolerance and increased  
377 circulating insulin and circulating and intestinal GLP-1 levels compared to hypothyroid animals.

378 Using a wide range of models the authors demonstrate that liver TRB is required for (the majority  
379 of) this effect. Intestinal FXR is shown to modulate the beneficial effect of T3 on GLP-1 levels,  
380 plasma insulin and plasma glucose in hypothyroid mice. The authors postulate that the link between  
381 (hepatic) thyroid hormone signaling and changes in bile acid composition, resulting in increased  
382 GLP-1 secretion, is the enzyme CYP8B1 in liver. The data is novel, interesting and clinically  
383 relevant given the development of liver specific TRB agonists for the treatment of metabolic disease.  
384 Specific Comments:

385 1. Is hyperglycemia commonly found in hypothyroid mouse models. To this reviewers knowledge  
386 the answer is no. What is the reason for this here. Other examples should be brought forward.

387 **Response to the Reviewer's Comments:** We thank the reviewer for the comments and suggestion.  
388 As we mentioned in the introduction of our manuscript, the role of TH in glucose metabolism is  
389 profound. Abnormal glucose homeostasis has been noticed in hypothyroid patients and animal  
390 models of hypothyroidism, although the proposed underlying mechanisms sometimes differ among  
391 different studies [14-20]. As the reviewer suggested, we searched literatures published recently and  
392 listed just a few here: 1) a PNAS paper contributed by Dr. Carrasco, reviewed by Dr. Hollenberg  
393 and Dr. Moore, showed impaired glucose tolerance in LID mice in Fig. 3A; 2) similar result could  
394 be found in a Diabetes paper by Dr. Kieffer; 3) increased fasting glucose levels in hypothyroid rats  
395 were shown in a paper by Dr. Ayuob; 4) in addition to animal studies, low fasting glucose levels  
396 were observed in patients with SCH in two papers reported by Dr. Gao.

397 As the suggested, we employed propylthiouracil (PTU) to induce hypothyroidism in mice. We also  
398 observed increased glucose levels, impaired oral glucose tolerance, and decreased insulin and GLP-  
399 1 levels in these hypothyroid mice induced by PTU administration (Supporting data Fig. 3a).

400 2. The increased levels of GLP-1 described in Figure 1J are not clear.

401 **Response to the Reviewer's Comments:** We thank the reviewer for the comments. As the reviewer  
402 suggested, we provided another image with stronger staining intensity showing the increased GLP-  
403 1 levels (Fig. 1g). To substantiate our conclusion, we performed immunohistochemistry for GLP-1  
404 and obtained similar results (Supplementary Fig. 1g). We have provided these data in our revised  
405 manuscript.

406 3. Why was GLP-1 not given directly to hypothyroid animals?

407 **Response to the Reviewer's Comments:** We thank the reviewer for the comments. As suggested,  
408 we tested whether GLP-1 administration could improve the glucose homeostasis in hypothyroid  
409 mice (MMI mice). In agreement with our working model, GLP-1 treatment increased insulin levels,  
410 decrease glucose levels, and enhance oral glucose tolerance in MMI mice (Fig. 1h-j), suggesting  
411 that T3-induced elevation of GLP-1 levels had the capacity to improve glucose metabolism in  
412 hypothyroid mice.

413 4. Ideally, further experiments should be provided to demonstrate KO of the TR in the liver. ie TH  
414 mediated gene expression of classic TR target genes. The model is under-described in all aspects.

415 **Response to the Reviewer's Comments:** We thank the reviewer for the comments. As the reviewer  
416 suggested, we examined the classic T3 target genes (Dio1, Me, Scd1, and Sp14) in the liver of  
417 LTR $\beta$ KO mice with or without T3 treatment (Supporting data Fig. 3b). We found that the mRNA

418 expression of positively regulated genes (Dio1, Me, and Sp14) was decreased in the liver of  
419 LTR $\beta$ KO mice. T3 could increase the mRNA expression of these positively regulated genes in the  
420 liver of Floxed mice but not LTR $\beta$ KO mice. These data agree with the notion that TR $\beta$  is the major  
421 TR isoform in liver. For Scd1, a T3 negatively regulated gene, the expression pattern is very similar  
422 to that of CYP8B1 (Fig. 4i). As suggested, we provided more information for Floxed mice and  
423 LTR $\beta$ KO mice in our revised manuscript, including details about targeting methodology, genomic  
424 context, and general phenotype (Supplementary Fig. 2d-i, 3b and Supporting data Fig. 1d, Page 6,  
425 Line 185-188 and Page 16, Line 528-532).

426 5. In Figure 2 and Figure 3 the induction of hypothyroidism leads to a rise in blood glucose in both  
427 WT and KO animals and T3 or the analog reduces it only in WT or floxed animals. Why is there an  
428 induction of BG in hypothyroidism in the absence of the TR?

429 **Response to the Reviewer's Comments:** We thank the reviewer for the comments. The data shown  
430 in Fig. 2 and Fig. 3 (previously version) were not from hypothyroid animals. In this study, we did  
431 not observe abnormal glucose levels in LTR $\beta$ KO mice (Fig. 2d, 3g and Supplementary Fig. 2i),  
432 which was consistent with the observation that loss of TR $\beta$  in liver only slightly increased the mRNA  
433 levels but not the protein levels of CYP8B1 (Fig. 4f, i) and had no effect on ileal BA composition  
434 (Fig. 4n, 5d) and GLP-1 production (Fig. 2b, 3e and Supplementary Fig. 2h), indicating that  
435 compensatory mechanisms may exist. To investigate the blood glucose levels and T3 effect in  
436 LTR $\beta$ KO mice in hypothyroid state, we treated LTR $\beta$ KO mice with MMI (Supporting data Fig. 1e).  
437 Our observations are as follows: 1) In line with data obtained in wild type mice (Supplementary Fig.  
438 1k, l, 4h), MMI treatment could increase CYP8B1 mRNA expression and glucose levels and impair  
439 oral glucose tolerance in Floxed mice (Supporting data Fig. 1e, f). The finding that MMI treatment  
440 had a more deleterious effect than loss of TR is not surprising, because unlike steroid hormone  
441 receptors, TRs can act in the absence of the ligand as aporeceptors (apoTRs), which have an intrinsic  
442 activity rather than being silent. These apoTRs repress basal transcription of positively regulated  
443 genes and stimulate that of negatively regulated genes. We speculate that unliganded TRs (apoTRs)  
444 in MMI mice might act to increase CYP8B1 mRNA expression, thereby altering the BA composition  
445 and impairing glucose metabolism. 2) Consistent with our previous findings in euthyroid state (Fig.  
446 2a-e, 4i), T3 treatment markedly repressed the mRNA expression of CYP8B1 and lowered the  
447 glucose levels in MMI-treated Floxed mice, while loss of hepatic TR $\beta$  could block these effects in  
448 MMI-treated mice (Supporting data Fig. 1e, f), further supporting our hypothesis that hepatic TR $\beta$   
449 signaling contributes to the benefits seen with the T3 treatment. 3) It has been proposed that TH  
450 deprivation induces a strong apoTR activity, while the effect of the absence of TH can be attenuated  
451 by the removal of TR. Here, we found that the mRNA levels of CYP8B1 were not reduced in MMI-  
452 treated LTR $\beta$ KO mice compared to MMI-treated Floxed mice (Supporting data Fig. 1e). Moreover,  
453 the glycemic control was not improved after the removal of hepatic TR $\beta$  in MMI-treated mice  
454 (Supporting data Fig. 1e, f). These observations indicate that apoTR $\alpha$  but not apoTR $\beta$  may play a  
455 more important role at least in the control of CYP8B1 transcription, which agrees with the previous  
456 notion that TR $\beta$  may have no aporeceptor activity in liver. Since we mainly focus on the beneficial  
457 T3 effect and the role of liganded TR $\beta$  (holoTR $\beta$ ) in current study, we provided these data from  
458 hypothyroid LTR $\beta$ KO mice as supporting data to avoid confusion due to the potential contribution  
459 from apoTR.

460 Additionally, we noticed that loss of hepatic TR $\beta$  abolished the T3 effect on CYP8B1 expression



461 and oral glucose tolerance in MMI-treated mice, which further supports our proposed model  
462 involving the action of hepatic TR $\beta$  and incretin GLP-1 (Supporting data Fig. 1e, f). We also noticed  
463 a small reduction of glucose levels in MMI-treated LTR $\beta$ KO mice after T3 treatment, although the  
464 difference did not reach statistical significance ( $p=0.06$ ) (Supporting data Fig. 1e, left panel). These  
465 data indicate that systemic administration of T3 might also affect glucose levels via other pathways  
466 or mechanisms, which seemed to be not as dominant as those mediated by hepatic TR $\beta$  under these  
467 experimental conditions. Collectively, we believe we have discovered a novel role of T3 and hepatic  
468 TR $\beta$  in glucose homeostasis, which involves the regulation of GLP-1 production via BA-mediated  
469 FXR antagonism. Nevertheless, we did not intend to exclude the possibility that other mechanism  
470 exists that also contribute the profound role of T3 in glucose homeostasis.

471 6. In Figure 3 there is no data on the high fat diet mice ie food intake, body weight etc. It is  
472 impossible to determine the effects of the MB compound in this setting.

473 **Response to the Reviewer's Comments:** We thank the reviewer for the comments. In line with  
474 previous data reported by Dr. Erion et. al. [21], we found that MB07811 treatment had no effects on  
475 food intake but could reduce the body weight and white fat mass in HFD-fed mice (Supplementary  
476 Fig. 3a, c-g). We have added these data to our revised manuscript.

477 7. In Figure 4 where is the RNA-Seq data of the genes regulated by feeding. What does Cyp8b1 do  
478 with increased feeding.

479 **Response to the Reviewer's Comments:** We thank the reviewer for the comments. As the reviewer  
480 suggested, we provided the accession code of our microarray data for the genes regulated by feeding  
481 (GSE184055) in our revised manuscript. CYP8B1 is highly regulated under various physiological  
482 and pathological conditions. CYP8B1 is known to be increased by fasting and downregulated by  
483 feeding through multiple mechanisms, including FXR-SHP/MAFG-mediated or FGFR4-mediated  
484 negative feedback on BA *de novo* synthesis, thereby modulating the BA profile and the  
485 hydrophobicity of BA pool to adapt to the feeding status or nutritional environment. Based on  
486 current evidence, we speculate that fasting-induced CYP8B1 expression induces an increase in CA  
487 production, which will facilitate the dietary lipid absorption for the next meal. On the other hand,  
488 refeeding-induced downregulation of CYP8B1 can lead to an increase in GLP-1 production to  
489 enhance the insulin action after the meal [22, 23]. Evidence also indicates that FoxO1 can regulate  
490 the CYP8B1 expression in an FXR-independent manner, thereby modulating lipid homeostasis [24].  
491 Regarding the expression of CYP8B1 upon increased feeding or HFD feeding, current evidences  
492 are not conclusive. We speculate that it is probably due to the differences in the nutritional status (as  
493 it is very sensitive to feeding), the protocol of HFD treatment, and the facility conditions. As the  
494 altered expression of CYP8B1 could affect systemic insulin action by modulating GLP-1 and insulin  
495 production, which might have either beneficial or deleterious effect on glucose and lipid metabolism  
496 dependent on the feeding pattern or condition or disease status or stage. Nevertheless, based on  
497 available knowledge, it has been proposed that targeting BA profile by inhibiting CYP8B1 might  
498 be a promising therapeutic strategy for metabolic diseases, including T2D.

499 8. Also, in Figure 4, T3 is known to regulate many other genes involved in bile acid transport that  
500 also regulate bile acid hydrophobicity including *cyp27a1* and *cyp3a11* and as well bile acid  
501 transporters. These genes are not included in the analysis shown. Interestingly, *Cyp8b1* has been  
502 identified previously as a target of TH signaling: Andersson U, Yang YZ, Bjorkhem I, Einarsson C,

503 Eggertsen G, Gafvels M. Thyroid hormone suppresses hepatic sterol 12 $\alpha$ -hydroxylase (CYP8B1)  
504 activity and messenger ribonucleic acid in rat liver: failure to define known thyroid hormone  
505 response elements in the gene. *Biochim Biophys Acta*. 1999;1438(2):167–174. Additionally, thyroid  
506 hormone signaling has also been shown to alter bile acid composition previously and thus regulate  
507 intestinal cholesterol absorption (Astapova et al, *JCI* 2014).

508 **Response to the Reviewer's Comments:** We thank the reviewer for the comments. We agree with  
509 the reviewer that systemic T3 treatment can regulate many hepatic genes involved in metabolism  
510 including BA metabolism. As the reviewer suggested, we analyzed our RNA-seq data (GSE184261)  
511 and provided these data in our revised manuscript (Supplementary Fig. 4a) and cited related papers  
512 [25, 26]. Indeed, as described in our manuscript, to understand the mechanism underlying the  
513 glucose-lowering effect of hepatic TH signalling, we performed RNA-seq followed by KEGG  
514 pathway analysis to identify hepatic genes or pathways regulated by T3 (Fig. 4a). KEGG pathway  
515 analysis of DEGs revealed that 72 pathways were regulated by T3 treatment, including primary BA  
516 biosynthesis (Fig. 4b). Given that intestinal GLP-1 is secreted postprandially and GLP-1-mediated  
517 incretin effect contributes to the glucose-lowering effect of T3, we compared the T3-regulated  
518 pathways with those pathways altered in response to oral intake of nutrients and identified 10  
519 pathways that were regulated by both T3 administration and nutrition ingestion (Fig. 4b, c). We then  
520 analyzed the overlapped gene sets in these 10 pathways and identified 22 genes (Supplementary Fig.  
521 4b), including CYP8B1. As CYP8B1 has been implicated in the regulation of GLP-1 secretion and  
522 glucose homeostasis [22]. We then speculated that CYP8B1 might be involved in the regulation of  
523 glucose metabolism by T3. Furthermore, our new data demonstrate that AAV-mediated knockdown  
524 of CYP8B1 could block the T3 effect on GLP-1 production, insulin and glucose levels, oral glucose  
525 tolerance (Fig. 4j-1), further suggesting that CYP8B1 might be the primary regulator that mediates  
526 the metabolic effect of T3 observed in this study.

527 We also agree with the reviewer that CYP8B1 is known to be regulated by T3. Since an early study  
528 failed to define known TRE in the promoter region of rat CYP8B1 (about 2-kb upstream of the start  
529 site), whether CYP8B1 is transcriptionally by TR $\beta$  has been a longstanding mystery. To better  
530 understand the regulation of CYP8B1 by T3, we analyzed recent ChIP-seq data (GSE159648)  
531 reported by Lazar's lab [27] and identified a super-enhancer encompassing the mouse CYP8B1 gene  
532 (Supplementary Fig. 4f). Moreover, we found that two putative TR binding sites (DR1 and DR4)  
533 identified early are in this super-enhancer, which are in the intergenic region but not in the promoter  
534 region of mouse CYP8B1 (Supplementary Fig. 4f). Our ChIP analysis revealed that TR $\beta$  could be  
535 recruited to the super-enhancer region containing these two binding sites (Fig. 4h). In line with our  
536 above super-enhancer analysis, we observed H3K27 acetylation in the same region (Fig. 4h). These  
537 results suggest that TR $\beta$  might transcriptionally controls the CYP8B1 expression through a super-  
538 enhancer-mediated mechanism. Additionally, our data obtained by using LTR $\beta$ KO mice suggest that  
539 the negative regulation of CYP8B1 by T3 requires TR $\beta$  (Fig. 4f, i).

540 Regarding the previous studies by Astapova et al from Hollenberg's lab, they employed a unique  
541 mouse model developed mice that express a mutant NCoR protein (L-NCoRAID) that cannot  
542 interact with the TR in the liver to explore the role of NCoR and TR. In their PNAS paper [25], they  
543 found that positive T3 targets were up-regulated in L-NCoRAID mice in the hypo- and euthyroid  
544 state. Interestingly, 326 genes were activated in hypothyroidism (representing negatively regulated  
545 TR/T3-target genes) in control mice, and only 3 of these genes were repressed (<1%) in hypothyroid

546 L-NCoRAID mice. The authors proposed that NCoR is a specific regulator of T3 action and  
547 mediates repression by unliganded TR (apoTR) in hypothyroidism. Therefore, NCoRAID mice  
548 might not be a suitable mouse model to study the T3 effect on negatively regulated T3 target genes  
549 or the role of liganded TRs (holoTRs) in the negative regulation by T3. Later, in their JCI paper[26],  
550 they found an alteration in the composition and hydrophobicity of BA pool in L-NCoRAID mice  
551 upon 2% cholesterol feeding, accompanied with changes in the expression of genes involved in BA  
552 synthesis (CYP27A1 and CYP3A11) and transport (ABCB11), which might eventually lead to a  
553 decrease in cholesterol absorption. Consistent with their PNAS paper, they did not observe any  
554 changes in CYP8B1 expression. They also showed that the mRNA expression of CYP27A1 and  
555 CYP3A11 were downregulated in the hypothyroid state, however, unlike CYP27A1, the expression  
556 of CYP3A11 was further suppressed by T3 treatment in hypothyroid mice. Thus, the T3 action in  
557 BA metabolism, especially the T3 action mediated by liganded TRs (holoTRs) is still not fully  
558 understood. Notably, although CYP27A1 is the first enzyme in the alternative BA synthetic pathway,  
559 it also participates in classic BA synthesis. Although CYP3A11 has been proposed to participate in  
560 alternative bile acid synthesis, loss of CYP3A11 would not affect BA composition [28]. As the  
561 regulation by BA composition by NCoRAID had not been investigated in the absence or after  
562 knockdown of downstream effectors, thus, whether these two enzymes are the primary players in  
563 hypothyroidism or the major players mediating the effect of apoTR in the euthyroid state requires  
564 further investigation.

565 It is also worth noting that these authors only investigated the BA profiles in L-NCoRAID mice,  
566 which provides indirect evidence for the role of TH signalling in BA metabolism. Moreover,  
567 previous studies mainly focused on the role of BAs in nutrition absorption, whether TH signalling  
568 could use BAs as essential endocrine molecules to control metabolic homeostasis is unknown.  
569 Furthermore, given that NCoR only interacts with TR in the absence of T3, NCoR may also bind to  
570 other transcription factors, and therefore the profound T3 effects, especially those effects mediated  
571 by liganded TRs (holoTRs) or negatively regulated target genes of T3, on BA metabolism and  
572 corresponding physiological consequence remain unclear and require extensive investigation.

573 Indeed, we observed similar results for those genes reported by Astapova et al from our RNA seq  
574 analysis, as mentioned above, we provided these data with other genes involved in BA synthesis  
575 and transport in our revised manuscript (Supplementary Fig. 4a). Whether these genes involved in  
576 BA transport and the regulation of BA hydrophobicity also play a role in the regulation of glucose  
577 homeostasis by T3 requires future investigation. Nevertheless, since CYP8B1 is responsible for CA  
578 synthesis, it is destined to be a master regulator of BA pool composition. Moreover, as we mentioned  
579 above, CYP8B1 is regulated by nutritional status, loss of CYP8B1 has been shown to be able to  
580 promote GLP-1 production thereby modulating glucose homeostasis, and knockdown of CYP8B1  
581 could attenuate the T3 effect on GLP-1 production and glucose metabolism (Fig. 4j-1), we propose  
582 that CYP8B1 might be the primary regulator that mediates the metabolic effect of T3 observed in  
583 this study.

584 9. The explanation of the data in Figure 7 is not clear. TSH is used to determine TH action. Do the  
585 TSH levels inversely correlate with the TH levels. Additionally do the T3 levels correlate with other  
586 actions of TH on the liver ie serum cholesterol.

587 **Response to the Reviewer's Comments:** We thank the reviewer for the comments. We agree with

588 the reviewer that TSH is normally used as an indicator for the changes of function in HPT axis,  
589 moreover, it is also the only diagnostic indicator for subclinical thyroid disease. However, the  
590 association between TSH and THs is weak or not significant or even “unexpected” within normal  
591 arrange, which is not surprising probably due to many compensatory mechanisms and feedback  
592 loops that maintains the levels of each hormone. In two cohorts used in our study, we did not detect  
593 any significant association between TSH and T3/T4 (Supporting data Fig. 3c, d, g, h). It is also  
594 worth noting that, in normal subjects, when the metabolic regulation is normal, the association  
595 between two hormones that are regulated reciprocally is hard to detect. For instance, the association  
596 between glucose and insulin is normally not seen in normal subject. Although we did not observe  
597 an association between TSH levels and the levels of GLP-1 or insulin, the levels of non-12 $\alpha$ -OH  
598 BAs, or the ratios of 12 $\alpha$ -OH BAs to non-12 $\alpha$ -OH BAs in this study (Supporting data Fig. 3e, f, i,  
599 j), we could not rule out the possibility that we would detect such an association in a larger cohort.  
600 As suggested, we also determined the association between T3 and total cholesterol levels in two  
601 cohorts we used in this study. As expected, we observed an inverse correlation between T3 and  
602 cholesterol levels in the plasma in the larger cohort (Supplementary Fig. 8a). A similar trend could  
603 be observed in the small cohort, although the association was not statistically significant probably  
604 due to the limited sample size (Supplementary Fig. 8b).

605 10. Is there a CYP8B1-KO model available or specific inhibitor that would allow you to study the  
606 effect of T3 in the absence of CYP8B1?

607 **Response to the Reviewer's Comments:** We thank the reviewer for the comments. As CYP8B1-  
608 KO model is not available in the lab, knockdown of hepatic CYP8B1 was achieved by using adeno-  
609 associated virus (AAV) expressing shRNA specific for CYP8B1. As expected, AAV-mediated  
610 knockdown of hepatic CYP8B1 could block the T3 effect on GLP-1 production, insulin and glucose  
611 levels, oral glucose tolerance (Fig. 4j-l and Supplementary Fig. 4g), further supporting our notion  
612 that CYP8B1 might be the primary regulator that mediates the metabolic effect of T3 observed in  
613 this study.

614 11. Does the attenuated change in CYP8B1 in MMI+T3 treated L-TRBKO mice result in measurable  
615 changes in intestinal bile acid composition compared to controls?

616 **Response to the Reviewer's Comments:** Yes. To test whether the attenuated change in CYP8B1  
617 expression levels in T3-treated LTR $\beta$ KO mice, as shown in Fig. 4f, would result in measurable  
618 changes in intestinal BA composition, we determined the ileal BA composition in these four groups  
619 of mice. Consistent with the CYP8B1 expression levels as shown in Fig. 4f, we found that the ileal  
620 BA composition (percentages of non-12 $\alpha$ -OH BAs and 12 $\alpha$ -OH BAs) was not altered in LTR $\beta$ KO  
621 mice as compared to Floxed mice, was changed after T3 treatment in Floxed mice, and loss of  
622 hepatic TR $\beta$  could abolished the T3 effect on BA composition (Fig. 4n, 5d).

623 **Other comments:**

624 12. Figure 2: . Please specify if these mice were rendered hypothyroid before being treated with T3  
625 as this isn't mentioned in the figure legends or corresponding results section

626 **Response to the Reviewer's Comments:** We thank the reviewer for the comments. Regarding  
627 Figure 2, these LTR $\beta$ KO mice and Floxed mice were not rendered hypothyroid before T3 treatment.  
628 We have performed new experiments and provided the data from MMI-treated LTR $\beta$ KO mice with

629 or without T3 treatment in Supporting data Fig. 1e, f.

630 13. The other bile acid receptor TGR5 has been described to be crucial for GLP-1 induction and  
631 several other metabolic effects. Did you find any evidence for a role of TGR5 in this pathway? Why  
632 did you choose to focus only on FXR?

633 **Response to the Reviewer's Comments:** We thank the reviewer for the comments. As suggested,  
634 we explored the role of TGR5 in this study. Similar to FXR, we did not detect any changes in mRNA  
635 expression of TGR5 in the ileum of MMI mice after T3 or MB07811 treatment (Supplementary Fig.  
636 5j). We then analyzed the levels of BAs with TGR5 agonist activities. We found that T3 treatment  
637 decreased the total percentage of BAs with TGR5 agonist activities in the ileum of MMI mice, while  
638 the percentage of DCA, which is abundant in ileum and exhibits potent TGR5 agonist activity, was  
639 not altered (Supplementary Fig. 5f). As we did not observe an elevation in the levels of these TGR5-  
640 agonistic BAs, we speculate that FXR-mediated pathway rather than TGR5-mediated pathway was  
641 critically involved after T3 treatment in mice. Consistently, positive correlation was not observed  
642 between the T3 level and the percentage of BAs with potent TGR5 agonist activities in human feces,  
643 further indicating that TGR5 signalling might not play a considerable role here (Supplementary Fig.  
644 8c, d).

645 To further test whether TGR5 signalling were activated, we first measured the cAMP levels in the  
646 ileum of mice and found that either T3 or MB07811 treatment could not affect the cAMP levels  
647 (Supplementary Fig. 5h). We also employed enteroendocrine STC-1 and NCI-H716 cells and mouse  
648 intestinal organoids to investigate the effect of T3 and BAs on TGR5 activation. Interestingly, we  
649 found that T3 treatment had no effect on cAMP levels in STC-1 cells, NCI-H716 cells, and mouse  
650 intestinal organoids (Supplementary Fig. 5i), suggesting that T3 could not affect GLP-1 production  
651 in L-cells by directly activating TGR5 signalling. Meanwhile, we found that, in contrast to potent  
652 TGR5-agonistic BAs, T $\beta$ MCA treatment did not elevate cAMP levels in these enteroendocrine cells  
653 and intestinal organoids (Supplementary Fig. 6h), suggesting that the elevated T $\beta$ MCA levels after  
654 T3 treatment would not activate TGR5 signalling in mice. We also treated STC-1 and NCI-H716  
655 cells and intestinal organoids with T $\beta$ MCA. We found that T $\beta$ MCA could increase GLP-1  
656 expression and production (Fig. 6e, g and Supplementary Fig. 6c-e), and decrease the mRNA  
657 expression of SHP, a downstream target of FXR, in these enteroendocrine cells and intestinal  
658 organoids (Supplementary Fig. 6c-e). These results together with other findings in this study, further  
659 suggest that the increased ileal T $\beta$ MCA after T3 treatment might promote the GLP-1 production in  
660 L-cells through FXR inhibition but not through TGR5 activation.

661 14. In general the paper is well written but the discussion would benefit from a thorough read-  
662 through to correct several grammatical errors.

663 **Response to the Reviewer's Comments:** We thank the reviewer for the comments. We have  
664 corrected a few mistakes and improved the discussion part in our revised manuscript.

665 15. Please specify where the MB07811 TRB agonist was purchased and include data or references  
666 that demonstrate its liver and TRB specificity.

667 **Response to the Reviewer's Comments:** We thank the reviewer for the comments. MB07811 can  
668 be either purchased from TargetMol or customized from Aadooq. We recently synthesized MB07811  
669 and its analogues with the help of Dr. Wenjun Tang from State Key Laboratory of Bio-Organic and

670 Natural Products Chemistry, Center for Excellence in Molecular Synthesis, Shanghai Institute of  
671 Organic Chemistry, Chinese Academy of Sciences. We have validated its selectivity (for TR $\beta$ ) by  
672 performing luciferase assay, its specificity (liver-targeting) by using THAI mice and its function  
673 (cholesterol-lowering) by using MMI mice (Supporting data Fig. 3k-m).

674 16. Have you done any of these experiments in female mice? If so please show (in supplemental)

675 **Response to the Reviewer's Comments:** Thanks for the comments. Indeed, we had performed a  
676 few key experiments in female mice and obtained similar results, suggesting that the regulation of  
677 GLP-1 production and glucose homeostasis by T3 treatment can also be observed in female mice  
678 (Supplementary Fig. 1i, 2h, i). Moreover, our recent data showed that deletion of hepatic TR $\beta$  in  
679 female mice could also diminish the T3 effects on the GLP-1 production and glucose homeostasis  
680 (Supplementary Fig. 2h, i). Thus, we speculate that the underlying mechanism for the regulation of  
681 glucose metabolism by T3 identified in this study is gender-independent.

682 17. Please state whether your human subjects provided informed consent in accordance with the  
683 declaration of Helsinki.

684 **Response to the Reviewer's Comments:** We thank the reviewer for the comments. Human subjects  
685 in this study provided informed consent in accordance with the declaration of Helsinki. We have  
686 included this information in our revised manuscript.

687

688

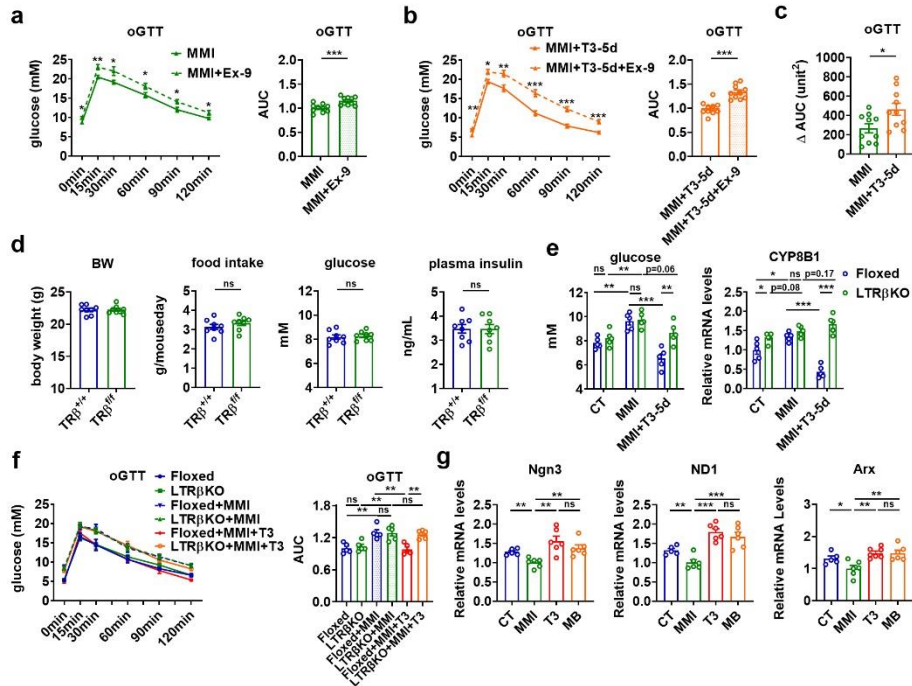692 **Supporting data Figure 1.**

693 (a and b) The data in Figure 1 n are shown separately. oGTT for MMI mice (a) and MMI+T3-5d  
 694 mice (b) treated with saline or Ex-9 for 5 days and the AUC (n=10). (c)  $\Delta$ AUC are calculated as  
 695 follows: (AUC<sub>MMI+EX-9</sub>-AUC<sub>MMI</sub>) and (AUC<sub>MMI+T3-5d+EX-9</sub>-AUC<sub>MMI+T3-5d</sub>), according to panel a and  
 696 b. (d) The BW, food intake, glucose and plasma insulin levels in TR $\beta$  Floxed (TR $\beta^{fl/fl}$ ) mice and  
 697 unfloxed mice (TR $\beta^{+/+}$ ) mice (n=8). (e) The blood glucose levels (left) and relative mRNA levels of  
 698 CYP8B1 in the liver (right) of Floxed and LTR $\beta$ KO mice treated with vehicle (CT), MMI or MMI  
 699 and 5 days of T3 (n=5). (f) oGTT for Floxed and LTR $\beta$ KO mice treated with vehicle (CT), MMI or  
 700 MMI and 5 days of T3 (n=5) and the corresponding AUC for oGTT (n=5). (g) The relative mRNA  
 701 levels of Ngn3, ND1, and Arx in the ileum of CT mice, MMI mice, and MMI mice after 5 days of  
 702 T3 or MB treatment (n=5-6). Means  $\pm$  SEM are shown. \*p<0.05, \*\*p<0.01 and \*\*\*p<0.001.

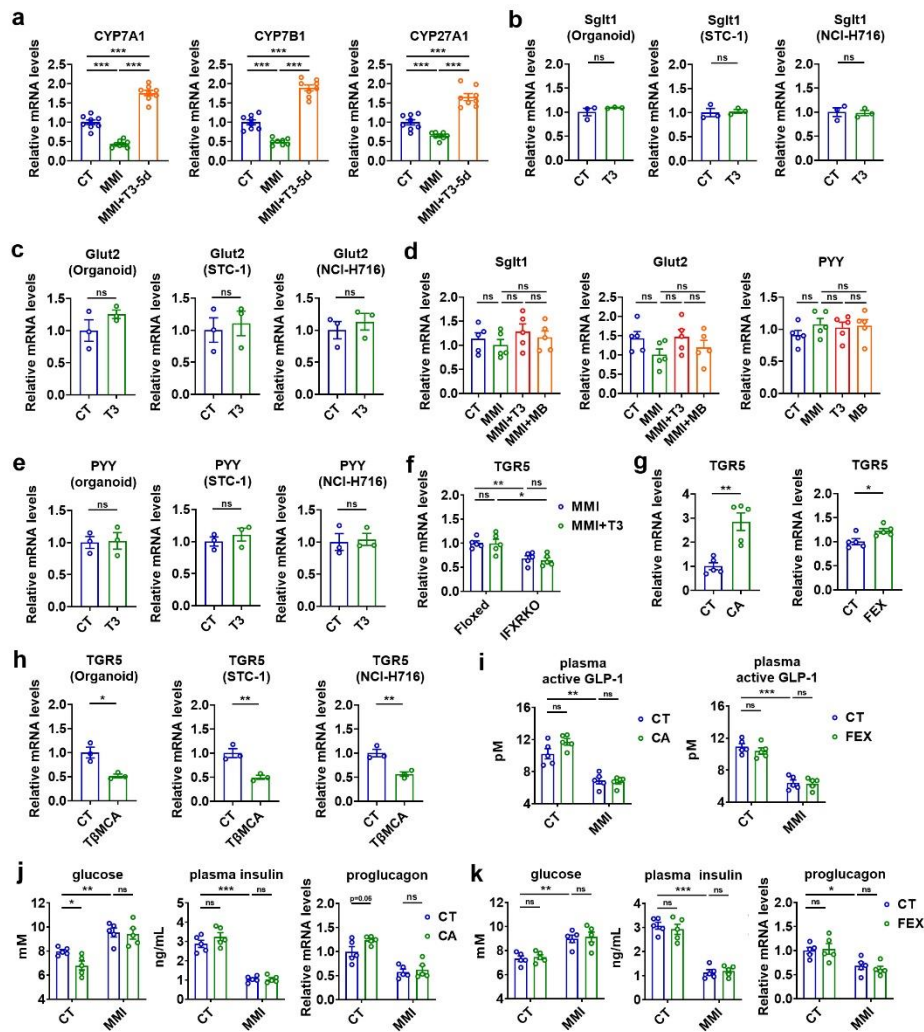

704

705

**Supporting data Figure 2.**

706

(a) The relative mRNA levels of CYP7A1, CYP7B1 and CYP27A1 in the liver of CT, MMI and

707

MMI+T3-5d mice (n=8). (b and c) Relative mRNA levels of SglT1 (b) and Glut2 (c) in mouse

708

intestinal organoids, STC-1 cells and NCI-H716 cells after T3 treatment (n=3). (d) The relative

709

mRNA levels of SglT1, Glut2, and PYY in the ileum of CT mice, MMI mice, MMI mice after 5 days

710

of T3 or MB treatment (n=5-6). (e) Relative mRNA levels of PYY in mouse intestinal organoids,

711

STC-1 cells and NCI-H716 cells after T3 treatment (n=3). (f) The relative mRNA levels of TGR5

712

in the ileum of Floxed and IFXRKO mice treated with MMI or MMI and 5 days of T3 (n=6). (g)

713

The relative mRNA levels of TGR5 in the ileum of mice treated with or without CA or FEX for 5

714

days as indicated (n=5). (h) Relative mRNA levels of TGR5 in mouse intestinal organoids, STC-1

715

cells and NCI-H716 cells after TBMCA treatment (n=3). (i-k) Plasma active GLP-1 (i), blood

716

glucose and plasma insulin levels, relative proglucagon mRNA levels (j and k) in the ileum of CT

717

and MMI mice treated with or without CA or FEX for 5 days as indicated (n=5). Means  $\pm$  SEM are

718

shown. \* $p < 0.05$ , \*\* $p < 0.01$  and \*\*\* $p < 0.001$ .

719



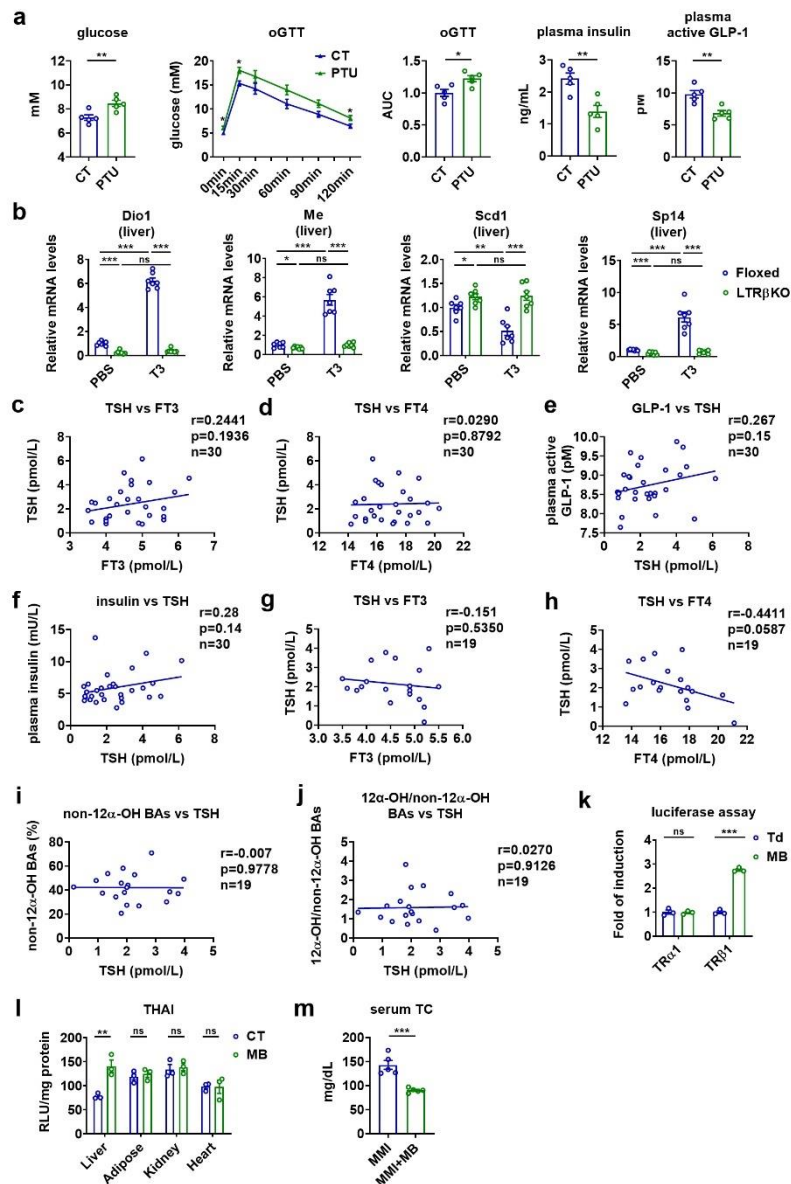

720

721 **Supporting data Figure 3.**

722 (a) Blood glucose levels, oGTT, plasma insulin and plasma active GLP-1 levels in mice treated with  
 723 PTU (n=5). (b) Relative mRNA levels of Dio1, ME, Scd1 and Sp14 in the liver of Floxed and  
 724 LTR $\beta$ KO mice treated with PBS or T3 for 5 days (n=6). (c-f) Correlation between free T3 and TSH  
 725 levels (c), free T4 and TSH levels (d), TSH levels and plasma active GLP-1 levels (e) or plasma  
 726 insulin levels (f) in a cohort of euthyroid subjects (n=30). (g-j) Correlation between free T3 and  
 727 TSH levels (g), between free T4 and TSH levels (h), between TSH levels and the percentage of fecal  
 728 non-12 $\alpha$ -OH BAs (i), or between TSH levels and the fecal 12 $\alpha$ -OH/non-12 $\alpha$ -OH ratios (j) in another  
 729 cohort of euthyroid subjects (n=19). (k) Luciferase assay showing that MB is an agonist with  
 730 selectivity for TR $\beta$  as compared to TR $\alpha$ . Pal-luc reporter plasmid was co-transfected with TR $\alpha$  or  
 731 TR $\beta$  plasmid in HepG2 cells followed by MB treatment. Reporter activity was analyzed and fold of  
 732 induction by MB treatment was calculated. (l) Luciferase activity in tissue samples, including liver,  
 733 adipose tissue (inguinal fat), kidney, and heart, from THAI mice treated with MB for 5 days (n=3). (m) Serum total cholesterol (TC) levels in MMI mice treated with MB for 5  
 734 days (n=5). Means  $\pm$  SEM are shown. \* $p$ <0.05, \*\* $p$ <0.01 and \*\*\* $p$ <0.001.  
 735

736 **Materials and Methods for Supporting data**

737 **Mice studies.** Mice were rendered hypothyroid by adding 0.15% propylthiouracil (PTU) (T1309,  
738 TargetMol) in their drinking water for four weeks. TH action indicator (THAI) mice were developed  
739 previously [29], which harbor a TH-responsive luciferase reporting system. THAI mice received  
740 MB07811 treatment at a dose of 5mg/kg/day for five days. Tissue samples were lysed in luciferase  
741 lysis buffer, supernatant was collected after centrifugation at 14,000 g at 4°C 10 min. Luciferase  
742 activity was determined with luciferase assay system reagent (E1910, Promega) on a Luminoskan  
743 Ascent. Serum total cholesterol levels were determined according to the manufacturer's instructions  
744 (294-65801, Wako).

745 **Cell luciferase assay.** To analyze MB07811 is an agonist with selectivity for TR $\beta$  as compared to  
746 TR $\alpha$ , pal-luc reporter plasmid was co-transfected with TR $\alpha$  or TR $\beta$  expressing plasmid as indicated  
747 in HepG2 cells followed by MB07811 treatment (100  $\mu$ M, 24h), the pRL-TK vector was used to  
748 normalize the luciferase activity. Cells were lysed 48 h after transfection and measured luciferase  
749 activity by using Dual-Luciferase® Reporter Assay System.

750 **Reference**

- 751 1. Chassande, O., *Do unliganded thyroid hormone receptors have physiological functions?*  
752 *J Mol Endocrinol*, 2003. **31**(1): p. 9-20.
- 753 2. Xie, C., et al., *An Intestinal Farnesoid X Receptor-Ceramide Signaling Axis Modulates*  
754 *Hepatic Gluconeogenesis in Mice*. *Diabetes*, 2017. **66**(3): p. 613-626.
- 755 3. Lund, M.L., et al., *L-Cell Differentiation Is Induced by Bile Acids Through GPBAR1 and*  
756 *Paracrine GLP-1 and Serotonin Signaling*. *Diabetes*, 2020. **69**(4): p. 614-623.
- 757 4. Pathak, P., et al., *Farnesoid X receptor induces Takeda G-protein receptor 5 cross-talk to*  
758 *regulate bile acid synthesis and hepatic metabolism*. *J Biol Chem*, 2017. **292**(26): p. 11055-  
759 11069.
- 760 5. Pathak, P., et al., *Intestine farnesoid X receptor agonist and the gut microbiota activate G-*  
761 *protein bile acid receptor-1 signaling to improve metabolism*. *Hepatology*, 2018. **68**(4): p.  
762 1574-1588.
- 763 6. Fang, S., et al., *Intestinal FXR agonism promotes adipose tissue browning and reduces*  
764 *obesity and insulin resistance*. *Nature Medicine*, 2015. **21**(2): p. 159-165.
- 765 7. Zheng, X.J., et al., *Hyocholic acid species improve glucose homeostasis through a distinct*  
766 *TGR5 and FXR signaling mechanism*. *Cell Metabolism*, 2021. **33**(4): p. 791-+.
- 767 8. Sinal, C.J., et al., *Targeted disruption of the nuclear receptor FXR/BAR impairs bile acid*  
768 *and lipid homeostasis*. *Cell*, 2000. **102**(6): p. 731-44.
- 769 9. Prawitt, J., et al., *Farnesoid X receptor deficiency improves glucose homeostasis in mouse*  
770 *models of obesity*. *Diabetes*, 2011. **60**(7): p. 1861-71.
- 771 10. Zhang, Y., et al., *Activation of the nuclear receptor FXR improves hyperglycemia and*  
772 *hyperlipidemia in diabetic mice*. *Proc Natl Acad Sci U S A*, 2006. **103**(4): p. 1006-11.
- 773 11. Watanabe, M., et al., *Lowering bile acid pool size with a synthetic farnesoid X receptor*  
774 *(FXR) agonist induces obesity and diabetes through reduced energy expenditure*. *J Biol*  
775 *Chem*, 2011. **286**(30): p. 26913-20.
- 776 12. Trabelsi, M.S., et al., *Farnesoid X receptor inhibits glucagon-like peptide-1 production by*  
777 *enteroendocrine L cells*. *Nat Commun*, 2015. **6**: p. 7629.
- 778 13. Ma, K., et al., *Farnesoid X receptor is essential for normal glucose homeostasis*. *J Clin Invest*,

- 779 2006. **116**(4): p. 1102-9.
- 780 14. Ferrandino, G., et al., *Pathogenesis of hypothyroidism-induced NAFLD is driven by intra-*  
781 *and extrahepatic mechanisms*. Proceedings of the National Academy of Sciences of the  
782 United States of America, 2017. **114**(43): p. E9172-E9180.
- 783 15. Bruin, J.E., et al., *Hypothyroidism Impairs Human Stem Cell-Derived Pancreatic Progenitor*  
784 *Cell Maturation in Mice*. Diabetes, 2016. **65**(5): p. 1297-1309.
- 785 16. Faddladdeen, K., et al., *Thymoquinone Preserves Pancreatic Islets Structure Through*  
786 *Upregulation of Pancreatic beta-Catenin in Hypothyroid Rats*. Diabetes Metab Syndr  
787 Obes, 2021. **14**: p. 2913-2924.
- 788 17. Song, Y., et al., *Thyroid-Stimulating Hormone Levels Are Inversely Associated with Serum*  
789 *Total Bile Acid Levels: A Cross-Sectional Study*. Endocr Pract, 2016. **22**(4): p. 420-6.
- 790 18. Xu, C., et al., *Abnormal Glucose Metabolism and Insulin Resistance Are Induced via the*  
791 *IRE1alpha/XBP-1 Pathway in Subclinical Hypothyroidism*. Front Endocrinol (Lausanne),  
792 2019. **10**: p. 303.
- 793 19. Salazar, P., et al., *Induction of hypothyroidism during early postnatal stages triggers a*  
794 *decrease in cognitive performance by decreasing hippocampal synaptic plasticity*.  
795 Biochimica Et Biophysica Acta-Molecular Basis of Disease, 2017. **1863**(4): p. 870-883.
- 796 20. Biondi, B., G.J. Kahaly, and R.P. Robertson, *Thyroid Dysfunction and Diabetes Mellitus: Two*  
797 *Closely Associated Disorders*. Endocrine Reviews, 2019. **40**(3): p. 789-824.
- 798 21. Erion, M.D., et al., *Targeting thyroid hormone receptor-beta agonists to the liver reduces*  
799 *cholesterol and triglycerides and improves the therapeutic index*. Proc Natl Acad Sci U S  
800 A, 2007. **104**(39): p. 15490-5.
- 801 22. Kaur, A., et al., *Loss of Cyp8b1 improves glucose homeostasis by increasing GLP-1*.  
802 Diabetes, 2015. **64**(4): p. 1168-79.
- 803 23. Li, T., et al., *Glucose and insulin induction of bile acid synthesis: mechanisms and*  
804 *implication in diabetes and obesity*. J Biol Chem, 2012. **287**(3): p. 1861-73.
- 805 24. Haeusler, R.A., et al., *Impaired generation of 12-hydroxylated bile acids links hepatic*  
806 *insulin signaling with dyslipidemia*. Cell Metab, 2012. **15**(1): p. 65-74.
- 807 25. Astapova, I., et al., *The nuclear corepressor, NCoR, regulates thyroid hormone action in*  
808 *vivo*. Proc Natl Acad Sci U S A, 2008. **105**(49): p. 19544-9.
- 809 26. Astapova, I., et al., *Hepatic nuclear corepressor 1 regulates cholesterol absorption through*  
810 *a TRbeta1-governed pathway*. J Clin Invest, 2014. **124**(5): p. 1976-86.
- 811 27. Shabtai, Y., et al., *A coregulator shift, rather than the canonical switch, underlies thyroid*  
812 *hormone action in the liver*. Genes Dev, 2021. **35**(5-6): p. 367-378.
- 813 28. Wahlström, A., et al., *Cyp3a11 is not essential for the formation of murine bile acids*.  
814 Biochem Biophys Rep, 2017. **10**: p. 70-75.
- 815 29. Mohacsik, P., et al., *A Transgenic Mouse Model for Detection of Tissue-Specific Thyroid*  
816 *Hormone Action*. Endocrinology, 2018. **159**(2): p. 1159-1171.
- 817
- 818

## REVIEWER COMMENTS

Reviewer #1 (Remarks to the Author):

The manuscript has been significantly improved with this revised version. The authors have included new data from critical experiments requested by the reviewers. Issues related to comparability of effects across relevant groups has been partially mitigated by the inclusion of wild type controls treated with T3 in some of those newly added loss-of-function experiments. Those experiments are key to compellingly test the authors hypothesis and provide critical mechanistic insights. Additional plasma measurements also increase the overall confidence in the results. I have no further objections.

Reviewer #2 (Remarks to the Author):

The authors have done a very comprehensive job in addressing my questions and comments. The work is novel and very intriguing, which will provide novel insights into understanding the effects and underlying molecular mechanism of hypothyroidism on glucose homeostasis.

Reviewer #4 (Remarks to the Author):

Yan et al. have described an interesting manuscript about a novel T3-mediated pathway in which T3 transcriptionally down-regulates CYP8B1 in the liver to generate bile acids that are FXR antagonists and cause increased GLP1 synthesis in the small bowel to cause increased insulin synthesis. This is an interesting pathway which highlights potential inter-organ communication and multi-hormone regulation to control insulin synthesis. It raises the possibility that blocking CYP8B1 could be a novel drug target to increase insulin secretion.

However, my major concern is an important one and is similar to Reviewer 1's concern. In Yan's model system, the mice are rendered hypothyroid with MMI. They are then injected with T3 daily for 5 days. However, since T3 has a half-life of 2 hours in mice, the mice are transiently hyperthyroid and then become hypothyroid again over the following 24 hours before their next T3 injection. Given this fluctuation, it is hard to know the precise thyroid state of the T3-injected mice. Thus, it would be useful to see whether this pathway plays a significant role in the euthyroid and hyperthyroid states where serum ft3 levels would be relatively constant. Performing such studies also would provide more clinical relevance to their studies. In Suppl. Fig. 1, the authors compare MMI-treated and euthyroid mice, and found decreased insulin and reduced GLP1 in MMI-treated mice compared to euthyroid mice. What happens to the bile acid composition in the euthyroid mice? Does AAV sh8B or FXR KO affect GLP1 and insulin secretion in euthyroid mice? The same types of questions could be asked for hyperthyroid mice. Note that the hyperthyroid mice would need to be treated with both T4 and T3 since T4 has a much longer half-life than T3.. As such, Yan's system describes chronic daily T3 injections over 5 days that repetitively stimulate or decrease target genes daily (reminiscent of a study by Ohba et al. on T3-treated

euthyroid mice. *Endocrinology* 157:1660–1672(2016)). It is interesting that one T3 injection did not generate effects on GLP1 and insulin secretion. Does MMI+T3-4h have any effects in CYP8B1 expression in comparison to 5d shown in Fig. 4d? The study by Ohba showed that acute vs. chronic stimulation by T3 has different effects on target genes.

Fig. 4. I would like to see transcriptome analysis of euthyroid vs MMI+T3-5d mice. Comparing hyperthyroid mouse transcriptome with MMI+T3-5d also would be useful. It would be useful to look at GLP1, insulin, GTT, and bile acid composition for euthyroid and hyperthyroid mice with MMI and MMI+T3-5d mice.

It would be interesting to examine insulin response in the liver in their studies. T3 typically stimulates gluconeogenesis in the liver, so does activation of this pathway by insulin change the direction towards glycolysis or are the livers of the hypothyroid mice still insulin resistant? The authors should look at IR phosphorylation, pAkt, pmTOR signaling for evidence of insulin signaling. They also could look at expression of T3 target genes, PEPCK, G6Pase, PDK4 mRNA, in the liver. It would be important to know whether this elaborate regulatory pathway is increasing insulin effects in the liver or is stimulating insulin secretion to serve other tissues.

Fig. 6. Does T3 have separate effects on intestinal cells? Could it regulate FXR levels, or GLP1 gene expression independently of FXR? Such studies could be done in cell lines or organoids described in Fig. 6e.

1 **REVIEWER COMMENTS**

2 **Reviewer #1 (Remarks to the Author):**

3 The manuscript has been significantly improved with this revised version. The authors have  
4 included new data from critical experiments requested by the reviewers. Issues related to  
5 comparability of effects across relevant groups has been partially mitigated by the inclusion of wild  
6 type controls treated with T3 in some of those newly added loss-of-function experiments. Those  
7 experiments are key to compellingly test the authors hypothesis and provide critical mechanistic  
8 insights. Additional plasma measurements also increase the overall confidence in the results. I have  
9 no further objections.

10 **Response to the Reviewer's Comments:** We thank the reviewer for the valuable and insightful  
11 comments and suggestions, which have improved our manuscript substantially.

12 **Reviewer #2 (Remarks to the Author):**

13 The authors have done a very comprehensive job in addressing my questions and comments. The  
14 work is novel and very intriguing, which will provide novel insights into understanding the effects  
15 and underlying molecular mechanism of hypothyroidism on glucose homeostasis.

16 **Response to the Reviewer's Comments:** We thank the reviewer for the detailed review and the  
17 constructive suggestions that have been helpful to improve our manuscript.

18 **Reviewer #4 (Remarks to the Author):**

19 Yan et al. have described an interesting manuscript about a novel T3-mediated pathway in which  
20 T3 transcriptionally down-regulates CYP8B1 in the liver to generate bile acids that are FXR  
21 antagonists and cause increased GLP1 synthesis in the small bowel to cause increased insulin  
22 synthesis. This is an interesting pathway which highlights potential inter-organ communication and  
23 multi-hormone regulation to control insulin synthesis. It raises the possibility that blocking CYP8B1  
24 could be a novel drug target to increase insulin secretion.

25 However, my major concern is an important one and is similar to Reviewer 1's concern. In Yan's  
26 model system, the mice are rendered hypothyroid with MMI. They are then injected with T3 daily  
27 for 5 days. However, since T3 has a half-life of 2 hours in mice, the mice are transiently hyperthyroid  
28 and then become hypothyroid again over the following 24 hours before their next T3 injection.  
29 Given this fluctuation, it is hard to know the precise thyroid state of the T3-injected mice. Thus, it  
30 would be useful to see whether this pathway plays a significant role in the euthyroid and  
31 hyperthyroid states where serum fT3 levels would be relatively constant. Performing such studies  
32 also would provide more clinical relevance to their studies.

33 **Response to the Reviewer's Comments:** We thank the reviewer for the comments. We agree with  
34 the reviewer that, normally, the MMI or PTU-treated mice receiving T3 daily injections for several  
35 days are not considered as hyperthyroid mice [1]. Although the T3 levels are repetitively elevated  
36 by daily T3 injections, mice are thought to be transiently hyperthyroid, which are not suitable for  
37 modeling clinical hyperthyroidism. However, given that, after 24 hours of the last T3 injection, the  
38 T3 normally would return to baseline levels similar to those in euthyroid mice (Supporting Fig. 1a

39 and TABLE 1 in a published paper by Zavacki et al. [1]), we speculate that the mice may not become  
40 hypothyroid again over the following 24 hours before the next T3 injection.

41 Importantly, we'd like to point out that this canonical model is normally employed to identify genes  
42 with maximal T3 responsiveness. In this study, instead of exploring T3-regulated genes, we used  
43 this mouse model, aiming to discover novel metabolic pathways not only responding to the T3  
44 treatment but also mediating the beneficial effects of T3. It is well accepted that the overall effects  
45 of thyroid hormone (TH) on glucose metabolism are complex, some of its effects are mediated via  
46 its action on multiple metabolic tissues, including liver, skeletal muscle, and adipose tissues, and  
47 some of its actions on different tissues may counteract [2]. Given that glucose intolerance is  
48 sometimes observed in thyrotoxicosis and hyperthyroidism normally worsens glycemic control, we  
49 think a hyperthyroid mouse model may be not suitable for this study that aims to explore the  
50 beneficial effect of T3 on glucose metabolism. Thus, we neither use the word "hyperthyroid" to  
51 describe the state of T3-treated MMI mice nor attempt to use this canonical "replenishment" model  
52 (MMI plus T3 treatment) to understand the dysregulated glucose metabolism in patients with  
53 clinical hyperthyroidism.

54 Indeed, based on our newly obtained data from a hyperthyroid mouse model (euthyroid mice treated  
55 with both T4 and T3, also referred to as TH-5d mice), we noticed that increased GLP-1 and insulin  
56 levels and reduced glucose levels could not be observed (Supporting Fig. 1c), although the elevated  
57 T3 and T4 levels in hyperthyroid mice (TH-5d mice) (Supporting Fig. 1b) could result in decreases  
58 in the hepatic CYP8B1 expression and the ratios of 12 $\alpha$ -OH to non-12 $\alpha$ -OH BAs and increases in  
59 the ileum FXR-antagonistic BA levels and proglucagon mRNA expression (Supporting Fig. 1d-h).  
60 Oral glucose tolerance was not significantly impaired, although the abnormal fasting glucose levels  
61 and higher glucose levels 15 minutes after oral glucose ingestion were noticed in hyperthyroid mice  
62 (TH-5d mice) (Supporting Fig. 1i). These results suggest that the sustained elevated or the  
63 pathological levels of T3 in these hyperthyroid mice may have deleterious effects. As  
64 hyperthyroidism can cause protein catabolism and increase renal blood flow and glomerular  
65 filtration rate [3], while kidney is thought to be a major site of GLP-1 extraction [4], we speculate  
66 that increased glomerular filtration in the hyperthyroid state may promote the renal catabolism of  
67 GLP-1, counteracting the effect of T3 on GLP-1 production. However, we cannot rule out the  
68 possibility that there may be more complex mechanisms involved. Due to the technical issues, the  
69 renal clearance of GLP-1 is difficult to study for the time being, although it deserves more attention.  
70 Anyway, we agree with the reviewer that the regulation of GLP-1 by TH in the hyperthyroid state  
71 requires further study, which will provide insights into the adverse events associated with clinical  
72 hyperthyroidism. We provided some discussion and cited related papers regarding these issues  
73 mentioned above in our revised manuscript.

74 In Suppl. Fig. 1, the authors compare MMI-treated and euthyroid mice, and found decreased insulin  
75 and reduced GLP1 in MMI-treated mice compared to euthyroid mice. What happens to the bile acid  
76 composition in the euthyroid mice? Does AAV sh8B or FXR KO affect GLP1 and insulin secretion  
77 in euthyroid mice? The same types of questions could be asked for hyperthyroid mice.

78 **Response to the Reviewer's Comments:** We thank the reviewer for the comments. Probably due  
79 to the limitation on the number of figures and the length of manuscript, we provided some data as  
80 supplementary figures. For example, we provided the data of BA levels and composition for

81 euthyroid mice in our manuscript submitted previously (Supplementary Fig. 4l (4i in previous  
82 version) and Supplementary Fig. 5b-e). We found that the decreased insulin and reduced GLP-1  
83 levels (Supplementary Fig. 1m,n) were accompanied with increased ratios of 12 $\alpha$ -OH to non-12 $\alpha$ -  
84 OH BAs and reduced FXR-antagonistic BA levels in MMI mice compared to euthyroid control  
85 mice (Supplementary Fig. 4l (4i in previous version) and Supplementary Fig. 5b-e).

86 As the reviewer suggested, we determined the effect of AAV-sh8B on GLP-1 and insulin in  
87 euthyroid and hyperthyroid mice. We found that AAV-sh8B infection could increase GLP-1 and  
88 insulin levels and decrease glucose levels in euthyroid mice (Supplementary Fig. 4i), which are  
89 similar to those observed in MMI-treated mice (Fig. 4j,k), suggesting that hepatic CYP8B1  
90 knockdown has beneficial effects in either euthyroid or hypothyroid mice. In contrast, in  
91 hyperthyroid mice (TH-5d mice), AAV-sh8B infection was unable to alter the levels of GLP-1,  
92 insulin, and glucose, although it could elevate the ileum GLP-1 expression (Supporting Fig. 2a).  
93 Notably, T4 and T3 treatment for 5 days decreased the GLP-1 and insulin levels and increased  
94 glucose levels in mice with hepatic CYP8B1 knockdown, further supporting our notion that the  
95 sustained elevated or pathological levels of T3 have deleterious effects (Supporting Fig. 2a), which  
96 is likely independent of the regulation of hepatic CYP8B1 by T3.

97 Regarding the effect of intestine-specific FXR knockdown on GLP-1 and insulin in a euthyroid state,  
98 we included these data in our manuscript submitted previously (Supplementary Fig. 7c). We found  
99 that the T3 effects on the GLP-1, insulin, and glucose levels were all attenuated in euthyroid  
100 IFXRKO mice (Supplementary Fig. 7c), which are similar to those observed in MMI-treated mice  
101 (Fig. 7a-c). These results indicate that intestinal FXR is indispensable for the beneficial effect of T3  
102 on GLP-1 and insulin production and glucose homeostasis. As we described in detail in our previous  
103 rebuttal letter (Page5, Line 197-200), consistent with our current knowledge of intestinal FXR  
104 signalling and our working hypothesis, the GLP-1 production was increased, while the glucose  
105 metabolism was improved in MMI-treated IFXRKO mice as compared to MMI-treated Floxed mice  
106 (Fig. 7a-c). On the other hand, in line with the previous findings that intestinal FXR is not required  
107 for maintaining the normal glucose homeostasis [5], the glucose metabolism was normal in  
108 IFXRKO mice in the euthyroid state, suggesting that compensatory mechanisms may exist  
109 (Supplementary Fig. 7c,d).

110 As the reviewer suggested, we tested the effect of intestinal FXR deficiency in the hyperthyroid  
111 state. Again, we neither observed the T3 on the serum levels of GLP-1, insulin, and glucose in  
112 euthyroid Floxed control mice (Supporting Fig. 2b), consistent with the data from wild-type  
113 C57BL/6J with (Supporting Fig. 2a) or without (Supporting Fig. 1c) AAV-CT infection, nor detected  
114 the effect of deletion of intestinal FXR in the euthyroid group as we observed previously  
115 (Supplementary Fig. 7c). As expected, we did not observe the effect of intestinal FXR deficiency in  
116 mice treated with both T3 and T4 (TH-5d mice) (Supporting Fig. 2b).

117 Note that the hyperthyroid mice would need to be treated with both T4 and T3 since T4 has a much  
118 longer half-life than T3. As such, Yan's system describes chronic daily T3 injections over 5 days  
119 that repetitively stimulate or decrease target genes daily (reminiscent of a study by Ohba et al. on  
120 T3-treated euthyroid mice. *Endocrinology* 157:1660–1672(2016)). It is interesting that one T3  
121 injection did not generate effects on GLP1 and insulin secretion. Does MMI+T3-4h have any effects



122 in CYP8B1 expression in comparison to 5d shown in Fig. 4d? The study by Ohba showed that acute  
123 vs. chronic stimulation by T3 has different effects on target genes.

124 **Response to the Reviewer's Comments:** We agree with the reviewer that mice need to be treated  
125 with both T4 and T3 to induce hyperthyroidism. As mentioned above, as requested, we employed  
126 this hyperthyroid mouse model (euthyroid mice treated with both T4 and T3, referred to as TH-5d  
127 mice) to test whether the T3 effects observed in MMI mice or euthyroid mice could be retained in  
128 the hyperthyroid state. We found that the elevated T3 and T4 levels could downregulate hepatic  
129 CYP8B1, decrease the ratios of 12 $\alpha$ -OH BAs to non-12 $\alpha$ -OH BAs, and increase the ileum FXR-  
130 antagonistic BA levels and proglucagon mRNA expression, but failed to elevate the GLP-1 and  
131 insulin levels and lower glucose levels in TH-5d mice (Supporting Fig. 1b-g), suggesting that the  
132 sustained elevated or pathological levels of T3 might have deleterious effects. According to our  
133 proposed model, the beneficial effect of T3 requires the downregulation of hepatic CYP8B1 and the  
134 alteration of BA composition to affect GLP-1 and insulin. We then speculate that it might take times  
135 to change the BA composition, therefore, the beneficial effect of T3 could not be observed 4 hours  
136 after one T3 injection (Supplementary Fig. 1b-d). In agreement with our hypothesis, we found that  
137 the BA composition (12 $\alpha$ -OH and non-12 $\alpha$ -OH BAs and FXR-antagonistic BAs) were not altered  
138 4 hours after one T3 injection (Supplementary Fig. 4m and 5f,g).

139 As suggested, we determined the expression of CYP8B1 four hours after one T3 injection. In  
140 contrast to MMI+T3-5d group, the mRNA levels of CYP8B1 were not reduced four hours after one  
141 T3 injection (Supplementary Fig. 4d). Importantly, the protein levels of CYP8B1 were not altered  
142 four hours after one T3 injection (Supplementary Fig. 4d). These results indicate that it might also  
143 take times to change the expression of CYP8B1 after T3 treatment. We then determined the  
144 CYP8B1 expression at different time points after single T3 injection (acute T3) (4 hours or 1 day  
145 after T3 injection) or daily T3 injections for 2 or 5 days (chronic T3) in euthyroid mice and found a  
146 trend of gradual decrease in CYP8B1 after T3 treatment (Supporting Fig. 3a). As the expression  
147 changes of CYP8B1 after acute and chronic T3 treatment did not follow the “desensitization”  
148 pattern observed by Ohba et al.[6], we speculate that the T3 responsiveness of CYP8B1 may have  
149 its own regulatory mechanism.

150 Our knowledge of the transcriptional regulation mediated by T3 and its receptor TR has been greatly  
151 expanded recently by taking advantage of the genome wide ChIP-seq analysis [7-11]. Growing  
152 evidence suggests that the dynamic TR binding and chromatin remodeling may be critically  
153 involved in the transcriptional regulation by T3. To better understand the regulation of CYP8B1 by  
154 T3, we performed ChIP analysis to investigate the TR occupancy and chromatin state after single  
155 T3 injection (acute T3) or daily T3 injections for 2 or 5 days (chronic T3) in euthyroid mice in the  
156 super-enhancer region we identified based on the latest data from Lazar’s lab [10], using a mouse  
157 model newly developed in our lab with an epitope tag located at the C-terminal of TR $\beta$  protein (HA-  
158 TR $\beta$  mouse), which allows us to explore the recruitment of endogenous TR $\beta$  at the low  
159 physiological levels (Supporting Fig. 3b).

160 In agreement with the recent hypothesis based on the genome wide ChIP-seq data, we also observed  
161 that T3 treatment could affect the TR recruitment to chromatin, as evident by decreased TR $\beta$   
162 occupancy around two putative TR binding sites (TRBS) (DR1 and DR4) (Supporting Fig. 3c,d).  
163 Moreover, consistent with the notion that H3K27ac, a hallmark for active enhancers, would decrease

164 in a T3-dependent manner at TRBSs near down-regulated genes, we found the occupancy of  
165 H3K27ac at the DR1 and DR4 sites was also decreased after T3 administration, suggesting a  
166 decrease in enhancer activity for CYP8B1 after T3 treatment (Supporting Fig. 3c,d).

167 Furthermore, for the DR1 site, H3K27ac was decreased 4 hours after T3 injection and maintained  
168 at a low level for at least 1 day after acute T3 treatment and during chronic T3 treatment. Decreased  
169 TR $\beta$  occupancy was only observed after chronic T3 treatment (Supporting Fig. 3c). For the DR4  
170 site, H3K27ac was decreased until 1 day after T3 injection and maintained at a low level during  
171 chronic T3 treatment. TR $\beta$  occupancy was decreased as early as 4 hours after acute T3 treatment  
172 and maintained at a low level for at least 1 day after acute T3 treatment and during chronic T3  
173 treatment (Supporting Fig. 3d). As the dynamics of TR recruitment and H3K27ac occupancy at DR1  
174 and DR4 seem to be differentially regulated by T3, we speculate that the TR binding and chromatin  
175 remodeling at DR1 and DR4 sites may be independently regulated after T3 treatment. Although a  
176 decrease in TR binding was always accompanied with a reduction of H3K27ac during chronic T3  
177 treatment, we speculate that decreased TR binding may not be required for the reduction of  
178 H3K27ac and vice versa. As the decrease in H3K27ac occurred prior to the decline in TR occupancy  
179 for the DR1 site, while the reduction of H3K27ac occurred after the decline in TR binding for the  
180 DR4 site, we speculate that binding site-dependent mechanisms may also exist. As the chromatin  
181 remodeling is highly dynamic and other chromatin modifications are also involved, the epigenetic  
182 landscape of the enhancer and promoter of CYP8B1 requires further investigation in different  
183 thyroid states and at more time points after T3 treatment in the future.

184 We provided some background information and cited important papers mentioned above (including  
185 the paper by Ohba et al.) in our revised manuscript, for a better understanding the current knowledge  
186 of the transcriptional regulation mediated by T3 and its receptor TR, especially for people not in TR  
187 field.

188 Fig. 4. I would like to see transcriptome analysis of euthyroid vs MMI+T3-5d mice. Comparing  
189 hyperthyroid mouse transcriptome with MMI+T3-5d also would be useful. It would be useful to  
190 look at GLP1, insulin, GTT, and bile acid composition for euthyroid and hyperthyroid mice with  
191 MMI and MMI+T3-5d mice.

192 **Response to the Reviewer's Comments:** As suggested, we first compared the 4428 differential  
193 expressed genes (DEGs) identified in MMI+T3-5d mice as compared to MMI mice and 2763 DEGs  
194 identified in euthyroid (CT) mice as compared to MMI mice and found 1412 overlapped DEGs  
195 (Supporting Fig. 3e) (RNA-seq data in this study, GSE184261), suggesting that the DEGs in  
196 euthyroid (CT) and MMI-T3-5d mice as compared to MMI mice exhibit a significant degree of  
197 overlap. The heatmap of the overlapped DEGs showed that these DEGs might be classic T3-  
198 regulated genes, although the responsiveness or sensitivity of individual DEGs to MMI or T3  
199 treatment was different (Supporting Fig. 3f).

200 Also as suggested, we compared the DEGs identified in MMI+T3-5d mice as compared to MMI  
201 mice (RNA-seq data, GSE184261) and DEGs identified in hyperthyroid (Chronic T3) mice as  
202 compared to euthyroid (NT, no treatment) mice (microarray data from Ohba et al.). We found that  
203 the DEGs identified from these two datasets exhibit a significant degree of overlap (Supporting Fig.  
204 3g), suggesting that quite a few of T3-regulated genes can be identified from both experimental  
205 models, including CYP8B1. Interestingly, a higher degree of overlap was observed for positively-

206 regulated genes as compared to negatively-regulated genes (Supporting Fig. 3g). Furthermore,  
207 KEGG pathway analysis of DEGs identified from these two datasets also revealed a large overlap,  
208 further suggesting that the T3 effects on quite a lot of pathways can be observed in both models  
209 (Supporting Fig. 3h).

210 Although there is considerable overlapping, alteration of some genes was exclusively detectable in  
211 one model but not in the other model, suggesting that these two experimental models are not exactly  
212 the same. Nevertheless, the negatively regulation of CYP8B1 after chronic T3 treatment could be  
213 observed in either MMI-induced hypothyroid mice or euthyroid mice with no treatment.

214 As suggested, we determined the GLP1, insulin, and BA composition in hyperthyroid mice (TH-5d  
215 mice) as compared to euthyroid mice (CT mice). We have described these results above in response  
216 to the Reviewer's Comments (Page 2, Line 54-73). Briefly, increased GLP-1 levels and reduced  
217 glucose levels could not be observed, although the elevated T3 and T4 levels could also decrease  
218 the hepatic CYP8B1 expression and the ratios of 12 $\alpha$ -OH to non-12 $\alpha$ -OH BAs, and increase the  
219 ileum FXR-antagonistic BA levels and proglucagon mRNA expression (Supporting Fig. 1b-h). Oral  
220 glucose tolerance was not significantly impaired, although the abnormal fasting glucose levels and  
221 higher glucose levels 15 minutes after oral glucose ingestion were noticed in hyperthyroid mice  
222 (TH-5d) (Supporting Fig. 1i). Given that hyperthyroidism may increase renal blood flow and  
223 glomerular filtration [3] and the kidney is a site for GLP-1 extraction [4], we speculate that increased  
224 glomerular filtration in the hyperthyroid state may counteract the effect of T3 on GLP-1 production  
225 by promoting the renal clearance of GLP-1. Due to the technical issues, the clearance of GLP-1 is  
226 difficult to study for the time being, although it deserves more attention and requires further study  
227 in the future. We thus provided some discussion and cites related papers in our revised manuscript.

228 It would be interesting to examine insulin response in the liver in their studies. T3 typically  
229 stimulates gluconeogenesis in the liver, so does activation of this pathway by insulin change the  
230 direction towards glycolysis or are the livers of the hypothyroid mice still insulin resistant? The  
231 authors should look at IR phosphorylation, pAkt, pmTOR signaling for evidence of insulin signaling.  
232 The also could look at expression of T3 target genes, PEPCK, G6Pase, PDK4 mRNA, in the liver.  
233 It would be important to know whether this elaborate regulatory pathway is increasing insulin  
234 effects in the liver or is stimulating insulin secretion to serve other tissues.

235 **Response to the Reviewer's Comments:** We thank the reviewer for the suggestion. As requested,  
236 we examined the insulin signalling and the expression of insulin or T3-related genes in our mouse  
237 models. We found that the hepatic insulin signalling was decreased in hypothyroid mice (MMI mice)  
238 as compared to euthyroid mice (CT mice) (Supporting Fig. 4a). As acute T3 treatment (4 hours after  
239 T3 injection) did not affect the insulin signalling in the liver of MMI mice, suggesting that the  
240 hepatic insulin signalling remained impaired (Supporting Fig. 4a). In contrast, daily T3 injections  
241 for 5 days increased the insulin signalling in the liver of MMI mice, suggesting that chronic T3  
242 treatment could restore the hepatic insulin signalling (Supporting Fig. 4a). Notably, although  
243 abnormal insulin levels were not observed in hyperthyroid mice (TH-5d mice) as compared to  
244 euthyroid mice (CT mice) (Supporting Fig. 1c), the hepatic insulin signalling was impaired in these  
245 hyperthyroid mice (TH-5d mice) (Supporting Fig. 4a). Collectively, we speculate that both  
246 hypothyroid and hyperthyroid mice had impaired hepatic insulin signalling and only chronic but not

247 acute T3 treatment could restore the hepatic insulin action in hypothyroid mice (MMI mice) with  
248 deficiency in TH production.

249 Gluconeogenic PEPCK and G6Pase are responsible for glucose anabolism, while PDK4 is a  
250 negatively regulator for glucose catabolism, the overall intracellular effect of three genes is to  
251 promote the glucose production and reduce the glucose usage. PEPCK, G6Pase, PDK4 are  
252 considered as T3 target genes, which are also negatively regulated by insulin signalling. As  
253 suggested, we examined the mRNA expression of PEPCK, G6Pase, PDK4. In agreement with the  
254 notion that they are T3 target genes, we found that they were all downregulated in the liver of  
255 hypothyroid mice (MMI mice) as compared to euthyroid mice (CT mice) (Supporting Fig. 4b),  
256 while they were all upregulated 4 hours after T3 injection in the liver of MMI mice (Supporting Fig.  
257 4c). In contrast, the mRNA expression of these T3 target genes tended to be downregulated rather  
258 than upregulated after daily T3 injections for 5 days in the liver of MMI mice (Supporting Fig. 4d).  
259 These results suggest that acute T3 treatment can upregulate PEPCK, G6Pase, PDK4 genes, thereby  
260 promoting gluconeogenesis and reduce glucose usage, while the expression of PEPCK, G6Pase,  
261 PDK4 would return to baseline expression after chronic T3 treatment.

262 Based on our finding that chronic but not acute T3 treatment could elevate insulin levels by  
263 promoting GLP-1 production in this study (Fig. 1c,f) and the increases in hepatic insulin signalling  
264 could be only observed after chronic but not acute T3 treatment (Supporting Fig. 4a), we speculate  
265 that insulin action might not be involved in the regulation of PEPCK, G6Pase, and PDK4 after acute  
266 T3 treatment, because the hepatic insulin signalling and insulin levels in MMI mice were not altered,  
267 while the chronic T3 treatment-induced and GLP-1-mediated increase in insulin production (as  
268 evident by the elevated insulin levels and the increased phosphorylation of key components of  
269 insulin signalling pathway) could counteract the effect of T3 on the expression of PEPCK, G6Pase,  
270 and PDK4. Therefore, rather than being elevated as observed after acute T3 treatment, the mRNA  
271 levels of PEPCK, G6Pase, and PDK4 returned to baseline expression levels in MMI mice after  
272 chronic T3 treatment. Collectively, our study might also provide new insight into the possible  
273 involvement of insulin action in the regulation of hepatic glucose metabolism by chronic T3  
274 treatment.

275 Additionally, further analysis of our RNA-seq data (GSE184261) revealed that, in MMI mice, acute  
276 T3 treatment might not affect glycolysis, in contrast, chronic T3 treatment might promote glycolysis,  
277 indicating that glycolysis might be tightly controlled by insulin but not by T3 and the regulation of  
278 glycolysis by chronic T3 treatment might be attributed to the elevation of insulin levels. As the  
279 insulin can lower blood glucose levels through multiple metabolic tissues via multiple mechanisms,  
280 based on all available data, we speculate that insulin action in both liver and other tissues would  
281 contribute to the glucose-lowering effect of insulin after chronic T3 treatment, which requires  
282 further investigation in the future.

283 Fig. 6. Does T3 have separate effects on intestinal cells? Could it regulate FXR levels, or GLP1  
284 gene expression independently of FXR? Such studies could be done in cell lines or organoids  
285 described in Fig. 6e.

286 **Response to the Reviewer's Comments:** We thank the reviewer for the comments. We had indeed  
287 explored the effect of T3 on GLP-1 production *in vitro* (Supplementary Fig. 2a). As we neither  
288 observed the effect of T3 on GLP-1 expression and secretion or FXR expression in STC-1 cells,

289 NCI-H716 cells, and mouse intestinal organoids (Supplementary Fig. 2a), nor detected the T3 effect  
290 on TGR5 mRNA levels in STC-1 cells, NCI-H716 cells, and mouse intestinal organoids (not  
291 included in our previous version, Supporting Fig. 5), we did not further explore the potential direct  
292 effect of T3 on these cells or organoids. As the reviewer suggested, we examined the FXR levels in  
293 these cell lines and organoids and found that the mRNA expression of FXR was not altered by T3  
294 treatment, which agrees with our proposed model that T3 regulates GLP-1 production via a non-cell  
295 autonomous mechanism involving hepatic TR and the alteration of BA composition.

296 **Attached please find the references, supporting figures and legends, and materials and**  
297 **methods associated with the Supporting data mentioned in this response letter.**

298

### 299 **Reference**

- 300 1. Zavacki, A.M., et al., *Type 1 iodothyronine deiodinase is a sensitive marker of peripheral*  
301 *thyroid status in the mouse*. Endocrinology, 2005. **146**(3): p. 1568-75.
- 302 2. Sinha, R.A., B.K. Singh, and P.M. Yen, *Thyroid hormone regulation of hepatic lipid and*  
303 *carbohydrate metabolism*. Trends Endocrinol Metab, 2014. **25**(10): p. 538-45.
- 304 3. Iglesias, P., et al., *Thyroid dysfunction and kidney disease: An update*. Rev Endocr Metab  
305 Disord, 2017. **18**(1): p. 131-144.
- 306 4. Deacon, C.F., *Circulation and degradation of GIP and GLP-1*. Horm Metab Res, 2004.  
307 **36**(11-12): p. 761-5.
- 308 5. Xie, C., et al., *An Intestinal Farnesoid X Receptor-Ceramide Signaling Axis Modulates*  
309 *Hepatic Gluconeogenesis in Mice*. Diabetes, 2017. **66**(3): p. 613-626.
- 310 6. Ohba, K., et al., *Desensitization and Incomplete Recovery of Hepatic Target Genes After*  
311 *Chronic Thyroid Hormone Treatment and Withdrawal in Male Adult Mice*.  
312 Endocrinology, 2016. **157**(4): p. 1660-1672.
- 313 7. Chatonnet, F., et al., *Genome-wide analysis of thyroid hormone receptors shared and*  
314 *specific functions in neural cells*. Proc Natl Acad Sci U S A, 2013. **110**(8): p. E766-75.
- 315 8. Grontved, L., et al., *Transcriptional activation by the thyroid hormone receptor through*  
316 *ligand-dependent receptor recruitment and chromatin remodelling*. Nat Commun,  
317 2015. **6**: p. 7048.
- 318 9. Praestholm, S.M., et al., *Multiple mechanisms regulate H3 acetylation of enhancers in*  
319 *response to thyroid hormone*. PLoS Genet, 2020. **16**(5): p. e1008770.
- 320 10. Shabtai, Y., et al., *A coregulator shift, rather than the canonical switch, underlies thyroid*  
321 *hormone action in the liver*. Genes Dev, 2021. **35**(5-6): p. 367-378.
- 322 11. Ramadoss, P., et al., *Novel mechanism of positive versus negative regulation by thyroid*  
323 *hormone receptor beta1 (TRbeta1) identified by genome-wide profiling of binding sites*  
324 *in mouse liver*. J Biol Chem, 2014. **289**(3): p. 1313-28.

325

326

327

328

329

330 **Supporting Figures and legends**

331

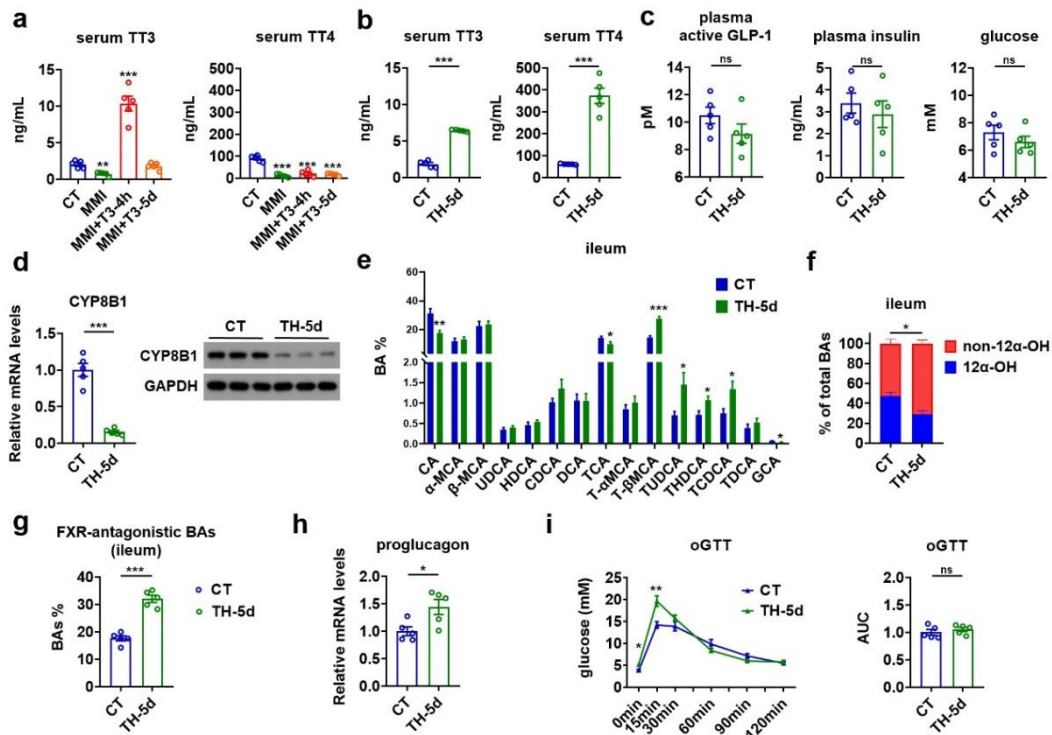

332

333

334 **Supporting Figure 1. CYP8B1, BA, GLP-1, insulin, and glucose levels in hyperthyroid mice.**

335 (a) The serum total T3 (left) and T4 (right) levels in CT, MMI, MMI+T3-4h and MMI+T3-5d mice  
 336 (n=5) (right). (b) The serum total T3 (left) and T4 (right) levels in CT and TH-5d mice (n=5). (c)  
 337 Plasma active GLP-1 levels, plasma insulin levels and blood glucose levels in CT and TH-5d mice  
 338 (n=5). (d) Relative mRNA (left) and protein (right) levels of hepatic CYP8B1 in CT and TH-5d  
 339 mice. (e) The percentage of individual BA in the ileum of CT and TH-5d mice (n=5). (f) Relative  
 340 levels of 12 $\alpha$ -OH (blue) and non-12 $\alpha$ -OH (red) BAs in the ileum of CT and TH-5d mice (n=5). (g)  
 341 The percentage of non-12 $\alpha$ -OH FXR-antagonistic BAs, including T( $\alpha$ / $\beta$ )MCA, (T/G)UDCA and  
 342 (T)HDCA in the ileum of CT and TH-5d mice (n=5). (h) The relative mRNA levels of proglucagon  
 343 in CT and TH-5d mice (n=5). (i) oGTT for CT and TH-5d mice (left) and the AUC (right) (n=5).  
 344 CT mice (euthyroid) are untreated control mice, while TH-5d mice (hyperthyroid) are euthyroid  
 345 mice treated with both T3 and T4 as described in Materials and Methods for Supporting data. Means  
 346  $\pm$  SEM are shown. \* $p$ <0.05, \*\* $p$ <0.01 and \*\*\* $p$ <0.001.

347

348

349

350

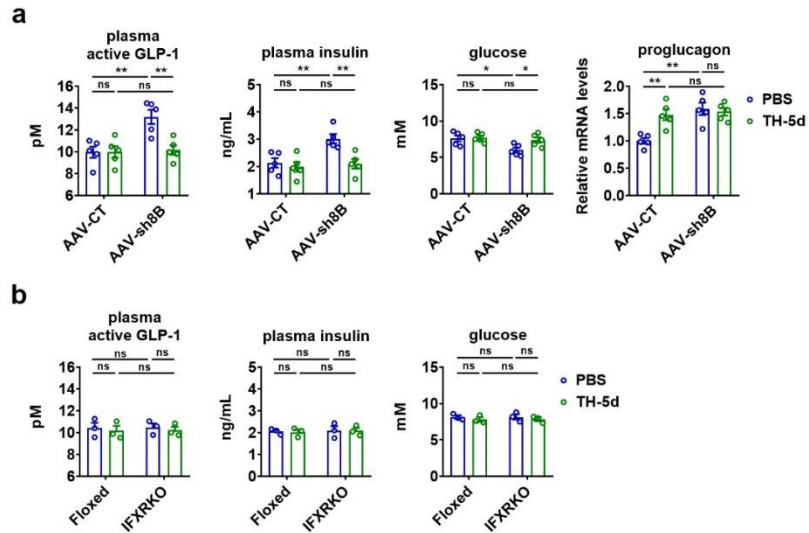

351

352

353 **Supporting Figure 2. The effects of hepatic CYP8B1 knockdown or intestine-specific FXR**  
 354 **knockout in euthyroid and hyperthyroid mice.**

355 (a) Plasma active GLP-1 levels, plasma insulin levels, blood glucose levels and relative mRNA  
 356 levels of proglucagon in CT and TH-5d mice administered with AAV-CT or AAV-shCYP8B1 (AAV-  
 357 sh8B) (n=5). (b) Plasma active GLP-1, plasma insulin and blood glucose levels in Floxed and  
 358 IFXRKO mice treated with PBS or TH for 5 days (n=3). Mice were treated with both T3 and T4  
 359 (TH) or PBS as described in Materials and Methods for Supporting data. Means  $\pm$  SEM are shown.  
 360 \*p<0.05 and \*\*p<0.01.

361

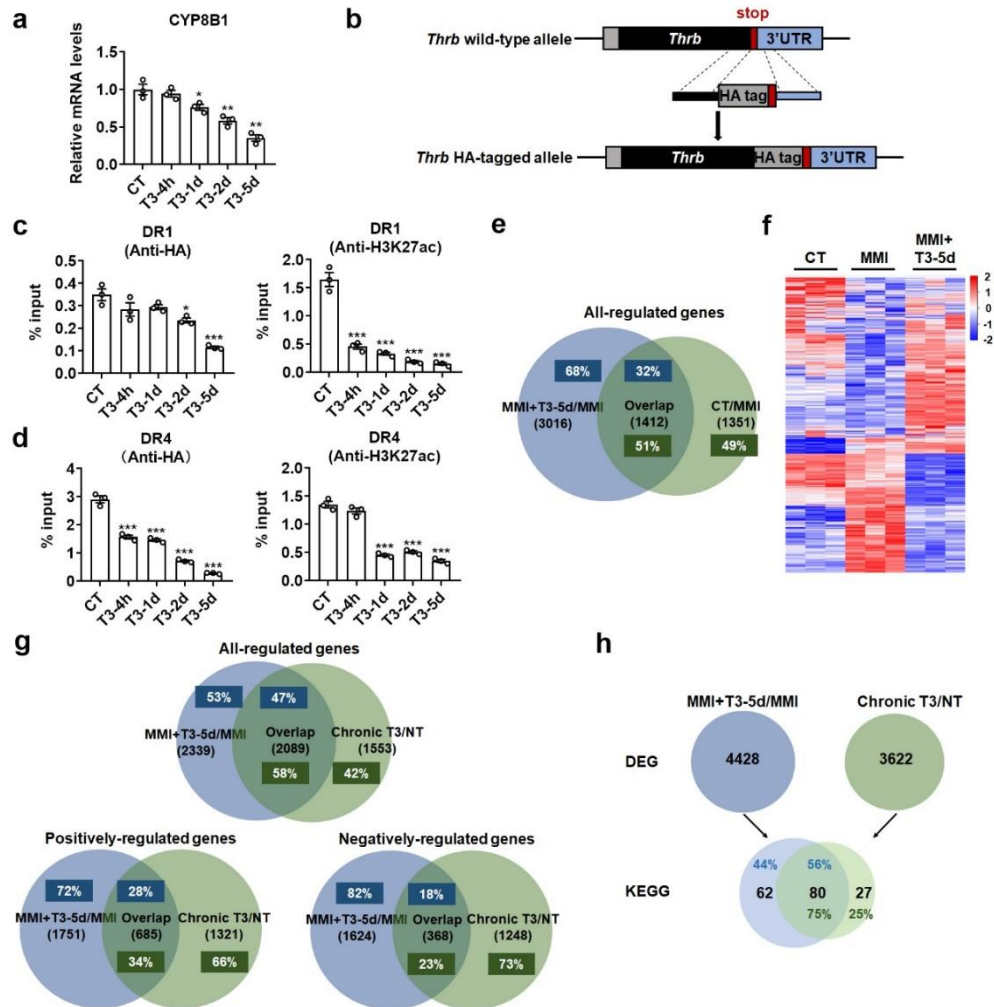

362

363 **Supporting Figure 3. The occupancy TR $\beta$  and H3K27ac in super-enhancer region of CYP8B1**  
 364 **and the comparison between changes in transcriptome in different experimental models.**

365 (a) Relative mRNA levels of hepatic CYP8B1 in mice treated with T3 (0.25  $\mu$ g/g; 0h (CT), 4h, 1d,  
 366 2d, 5d) (n=3). (b) Schematic diagram of generating HA-TR $\beta$  mouse line that harbors a HA-tag in  
 367 the C-terminal of *Thrb* gene. (c and d) ChIP-PCR showing enrichment (percent input normalized to  
 368 CT) of HA-TR $\beta$  (left) and H3K27 acetylation (right) at the putative TR $\beta$  binding sites (c, DR1) (d,  
 369 DR4) of the super-enhancer region of CYP8B1 in the liver of HA-TR $\beta$  mice treated with T3 (0.25  
 370  $\mu$ g/g; 0h (CT), 4h, 1d, 2d, 5d) (n=3). (e) Venn diagrams showing overlapped DGEs between  
 371 MMI+T3-5d vs MMI groups and MMI vs CT groups according to the RNA-seq data reported in  
 372 this study. (f) Heatmaps of DEGs identified in the liver between CT, MMI and MMI+T3-5d groups  
 373 (n=3) based on the RNA-seq data reported in this study. (g) Venn diagrams showing overlapped  
 374 DGEs between MMI+T3-5d vs MMI groups (RNA-seq data reported in this study) and Chronic T3  
 375 vs NT groups (microarray data reported by Ohba et al.). (h) Venn diagrams showing the overlapped  
 376 KEGG pathways identified from the DEGs between MMI+T3-5d vs MMI groups (RNA-seq data  
 377 reported in this study) and Chronic T3 vs NT groups (microarray data reported by Ohba et al.).  
 378 The detailed information for the Chronic T3 treatment group and no treatment (NT) group in the study  
 379 by Ohba et al. could also be found in the Materials and Methods for Supporting data. Means  $\pm$  SEM  
 380 are shown. \*p<0.05, \*\*p<0.01 and \*\*\*p<0.001.



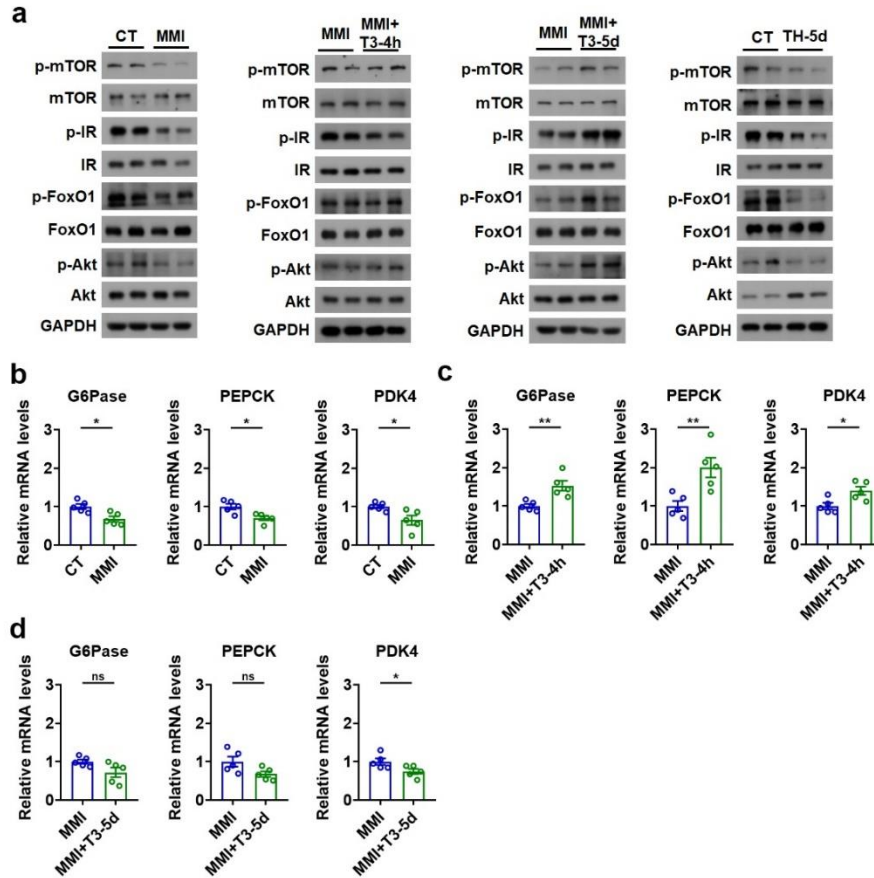

381

382 **Supporting Figure 4. Hepatic insulin signalling and the mRNA expression of G6pase, PEPCK,**  
 383 **and PDK4 in different experimental models.**

384 (a) Western blot analysis of key molecules of insulin signalling pathway in the liver of CT and MMI  
 385 mice, MMI and MMI+T3-4h mice, MMI and MMI+T3-5d mice, CT and TH-5d mice. (b-d) Relative  
 386 mRNA levels of G6Pase/PEPCK/PDK4 in the liver of CT and MMI mice, MMI and MMI+T3-4h  
 387 mice, MMI and MMI+T3-5d mice (n=5). Means  $\pm$  SEM are shown. \*p<0.05, \*\*p<0.01 and  
 388 \*\*\*p<0.001.

389

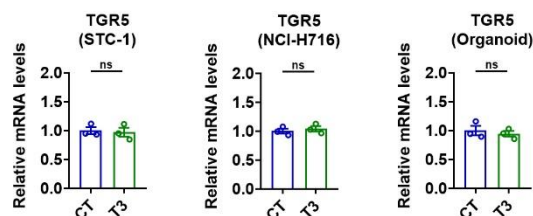

390

391 **Supporting Figure 5. The effect of T3 treatment on TGR5 mRNA expression in cultured cells.**

392 Relative mRNA levels of TGR5 in STC-1 cells, NCI-H716 cells and mouse intestinal organoids  
 393 after T3 treatment (n=3). Means  $\pm$  SEM are shown.

394 **Materials and Methods for Supporting data**

395 **Mice study**

396 HA-TR $\beta$  mice are mice harboring a HA-tag in the C-terminal of *Thrb* gene in C57BL/6J mice,  
397 developed by the Genome Tagging Project (GTP) Center of Shanghai Institute of Biochemistry and  
398 Cell Biology. Male C57BL/6J mice between ages 8 and 10 weeks were made hyperthyroid by  
399 intraperitoneal injection of 40  $\mu$ g/100 g T4 with 4  $\mu$ g/100 g T3 for 5 days (TH-5d mice). Control  
400 mice were injected with the same volume of PBS alone.

401 **Chromatin immunoprecipitation assay**

402 Male HA-TR $\beta$  mice between ages 8 and 10 weeks received daily intraperitoneal injection of  
403 T3 (0.25  $\mu$ g per gram BW) as indicated time in the figure. ~25mg of frozen liver material was used  
404 per IP sample from 3–4 mice in each group. Livers were homogenized in PBS containing 1%  
405 formaldehyde, incubated 10 min at room temperature and quenched with 0.125 M glycine. ChIP  
406 assays were performed using an EZ Magna ChIP G kit (Millipore) according to the manufacturer's  
407 protocol. 2 $\mu$ g/IP of antibody was used in HA (3724S, Cell Signaling Technology) and H3K27ac  
408 (ab4729, Abcam) ChIP experiments.

409 **Analysis of mRNA and protein expression**

410 For qRT-PCR analysis, primers for G6Pase, PEPCK and PDK4 are show below: mG6Pase-F,  
411 CTCTGGCCATGCCATG; mG6Pase-R, GCTGGCATTGTAGATGCC; m PEPCK -F, GAGAAAG  
412 CATTCAACGCCA; m PEPCK -R, AGTTGTTGACCAAAGGCTTTTTTA; mPDK4-F, AGGGAG  
413 GTCGAGCTGTTCTC; mPDK4-R, GGAGTGTTCACTAAGCGGTCA. For western blot analysis,  
414 primary antibodies against p-Akt (9271S, Cell Signaling Technology), p-mTOR (2971S, Cell  
415 Signaling Technology), p-IR (3024S, Cell Signaling Technology), p-FoxO1(9461T, Cell Signaling  
416 Technology), mTOR (2983S, Cell Signaling Technology), FoxO1 (2880S, Cell Signaling  
417 Technology), IR (23413T, Cell Signaling Technology), Akt (9272S, Cell Signaling Technology)  
418 were used.

419 **Hormone measurement**

420 For the measurement of serum levels of total T3, a T3 (total) (Mouse/Rat) ELISA Kit (KA0925,  
421 Abnova) was used. For the measurement of serum levels of total T4, a Thyroxine (T4) ELISA Kit  
422 (MBS9711535, MYBiosource) was used.

423 **Data availability**

424 The liver RNA-seq data from CT, MMI and MMI+T3-5d groups generated in this study have  
425 been deposited in the Gene Expression Omnibus database under accession code GSE184261.  
426 Previously published liver microarray data from the Chronic T3 treatment group and no treatment  
427 (NT) group is from Gene Expression Omnibus: GSE68867.

428 **Notes:**

429 The other materials and methods were described in the paper.

## **REVIEWERS' COMMENTS**

Reviewer #4 (Remarks to the Author):

I am satisfied with responses to my comments. I appreciate the extra effort and experiments to address my concerns.

1 **REVIEWER COMMENTS**

2 **Reviewer #4 (Remarks to the Author):**

3 I am satisfied with responses to my comments. I appreciate the extra effort and experiments to  
4 address my concerns.

5 **Response to the Reviewer's Comments:** We thank the reviewer for the detailed review for helping  
6 us to improve our manuscript.
